# Supplementary material for: Phase-transfer-catalyzed cyclization reaction of nucleophilic addition to electron-deficient 1,3-conjugated enynes for the synthesis of functionalized 4H-pyrans
Source: Royal Society of Chemistry journal article supplement (doi:10.1039/c0ob01255f), 2011-01-01

# Phase-Transfer-Catalyzed Cyclization Reaction of Nucleophilic Addition to Electron-Deficient 1,3-Conjugated Enynes for Synthesis of Functionalized 4*H*-Pyran

Jie Hu,<sup>a</sup> Lei Liu,<sup>a</sup> Shangdong Yang,<sup>a\*</sup> and Yong-Min Liang<sup>a,\*</sup>

<sup>a</sup> State Key Laboratory of Applied Organic Chemistry, Lanzhou University, Lanzhou 730000, P.R. China.

Fax: +86-931-8912582; Tel: +86-931-8912593; e-mail: yangshd@lzu.edu.cn ; liangym@lzu.edu.cn,

## Table of Contents

|                                                                          |                |
|--------------------------------------------------------------------------|----------------|
| <b>1. General Remarks</b>                                                | <b>S1</b>      |
| <b>2. General procedure for the preparation of 2</b>                     | <b>S1</b>      |
| <b>3. References</b>                                                     | <b>S1</b>      |
| <b>4. Characterization data of compounds 1</b>                           | <b>S1-S3</b>   |
| <b>5. Characterization data of compounds 2</b>                           | <b>S3-S9</b>   |
| <b>6. <sup>1</sup>HNMR and <sup>13</sup>CNMR spectra for compounds 1</b> | <b>S10-S15</b> |
| <b>7. <sup>1</sup>HNMR and <sup>13</sup>CNMR spectra for compounds 2</b> | <b>S16-S35</b> |
| <b>8. X-ray crystal of 2fb</b>                                           | <b>S36</b>     |

## General Remarks:

Column chromatography was carried out on silica gel.  $^1\text{H}$  NMR spectra were recorded on 400 MHz in  $\text{CDCl}_3$  and  $^{13}\text{C}$  NMR spectra were recorded on 100 MHz in  $\text{CDCl}_3$  using TMS as internal standard. IR spectra were recorded on a FT-IR spectrometer and only major peaks are reported in  $\text{cm}^{-1}$ . All new compounds were further characterized by element analysis; copies of their  $^1\text{H}$  NMR and  $^{13}\text{C}$  NMR spectra are provided. Commercially available reagents and solvents were used without further purification.

## Starting Materials:

The preparation of the PTC 1 and PTC 2 were described in previous report,<sup>1</sup> the starting materials **1a**, **1b** and **1g** were prepared according to the previous literature<sup>2-5</sup> and the synthesis of the remaining substrates were similar.

- (1) K. Friedrich and H. Henning, *Chem. Ber.* 92, 2756 (1959).
- (2) M. Lautens, M. L. Maddess, E. L. O. Sauer, S. G. Ouellet, *Org Lett.* 2002, 4, 83.
- (3) M. Lautens, M. L. Maddess, *Org Lett.* 2004, 6, 1883.
- (4) T. Yao, X. Zhang, R. C. Larock, *J. Am. Chem. Soc.* 2004, 126, 11164.
- (5) X. Yu, B. Du, K. Wang, J. Zhang, *Org Lett.* 2010, 12, 1876.

## Typical procedure for the preparation of 2

To a solution of **1** (0.20 mmol) in 2.0 mL of  $\text{CH}_2\text{Cl}_2$  was added  $\text{Cs}_2\text{CO}_3$  (130.3 mg, 0.40 mmol) in the reaction vessel. The mixture was allowed to stir at room temperature for 1 minute and TBAF $\cdot$ 3 $\text{H}_2\text{O}$  (3.15 mg, 5 mol %) was added. The vessel was sealed and the resulting mixture was then heated at 60  $^\circ\text{C}$ . When the reaction was considered complete as determined by TLC analysis, the reaction was allowed to cool to room temperature and quenched with a saturated aqueous solution of ammonium chloride, and the mixture was extracted with EtOAc. The combined organic extracts were washed with water and saturated brine. The organic layers were dried over  $\text{Na}_2\text{SO}_4$ , filtered. Solvents were evaporated under reduced pressure. The residue was purified by chromatography on silica gel to afford **2**.

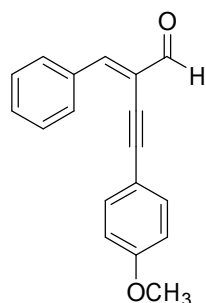

(*E*)-2-benzylidene-4-(4-methoxyphenyl)but-3-ynal (**1c**).  $^1\text{H}$  NMR (400 MHz,  $\text{CDCl}_3$ )  $\delta$  9.62 (s, 1H), 8.14-8.11 (m, 2H), 7.54-7.45 (m, 6H), 6.91-6.89 (d,  $J$  = 8.4 Hz, 2H), 3.82 (s, 3H);  $^{13}\text{C}$  NMR (100 MHz,  $\text{CDCl}_3$ )  $\delta$  191.1, 160.2, 150.3, 134.2, 133.3, 131.4, 130.5, 128.7, 122.9, 114.6, 114.1, 101.2, 82.2, 55.3. IR (neat,  $\text{cm}^{-1}$ ): 3367, 2198, 1692, 1508, 1250, 1027, 832, 758. Anal. Calcd for  $\text{C}_{18}\text{H}_{14}\text{O}_2$ : C 82.42; H 5.38. Found: C

82.49; H 5.42.

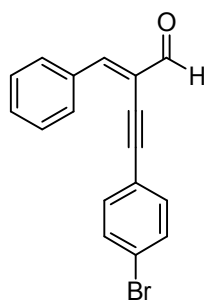

(*E*)-2-benzylidene-4-(4-bromophenyl)but-3-ynal (**1d**).  $^1\text{H}$  NMR (400 MHz,  $\text{CDCl}_3$ )  $\delta$  8.12-8.09 (m, 2H), 7.55-7.43 (m, 8H);  $^{13}\text{C}$  NMR (100 MHz,  $\text{CDCl}_3$ )  $\delta$  190.7, 151.7, 134.0, 133.2, 131.8, 131.7, 130.6, 128.8, 123.5, 122.4, 121.4, 99.7, 84.2. IR (neat,  $\text{cm}^{-1}$ ): 3371, 2204, 1692, 1484, 1137, 1069, 823, 756. Anal. Calcd for  $\text{C}_{17}\text{H}_{11}\text{BrO}$ : C 65.62; H 3.56. Found: C 65.68; H 3.46.

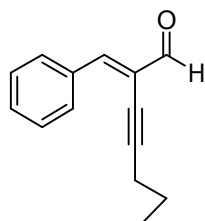

(*E*)-2-benzylidenehept-3-ynal (**1e**).  $^1\text{H}$  NMR (400 MHz,  $\text{CDCl}_3$ )  $\delta$  9.53 (s, 1H), 8.09-8.07 (m, 2H), 7.43-7.39 (m, 4H), 2.53-2.49 (t,  $J = 7.2$  Hz, 2H), 1.71-1.65 (t,  $J = 7.2, 14.4$  Hz, 2H), 1.09-1.05 (t,  $J = 7.2$  Hz, 2H);  $^{13}\text{C}$  NMR (100 MHz,  $\text{CDCl}_3$ )  $\delta$  191.4, 150.7, 134.0, 131.1, 128.4, 123.3, 103.1, 74.4, 21.7, 21.7, 13.4. IR (neat,  $\text{cm}^{-1}$ ): 3366, 2964, 1692, 1598, 1176, 758, 689. Anal. Calcd for  $\text{C}_{14}\text{H}_{14}\text{O}$ : C 84.81; H 7.12. Found: C 84.78; H 7.23.

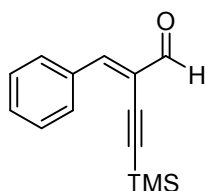

(*E*)-2-benzylidene-4-(trimethylsilyl)but-3-ynal (**1f**).  $^1\text{H}$  NMR (400 MHz,  $\text{CDCl}_3$ )  $\delta$  9.52 (s, 1H), 8.12-8.10 (m, 2H), 7.48 (s, 1H), 7.44-7.42 (m, 3H), -0.30 (s, 9H);  $^{13}\text{C}$  NMR (100 MHz,  $\text{CDCl}_3$ )  $\delta$  190.5, 152.1, 133.7, 131.5, 130.5, 128.4, 122.2, 107.5, 98.4, -0.59. IR (neat,  $\text{cm}^{-1}$ ): 3367, 2960, 1692, 1596, 1158, 891, 759, 689. Anal. Calcd for  $\text{C}_{14}\text{H}_{16}\text{OSi}$ : C 73.63; H 7.06. Found: C 73.69; H 7.15.

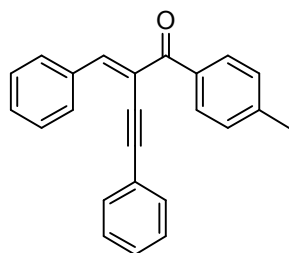

(*E*)-2-benzylidene-4-phenyl-1-*p*-tolylbut-3-yn-1-one (**1h**).  $^1\text{H}$  NMR (400 MHz,

CDCl<sub>3</sub>)  $\delta$  8.09-8.07 (d,  $J$  = 6.8 Hz, 2H), 7.94-7.92 (d,  $J$  = 8.4 Hz, 2H), 7.57 (s, 1H), 7.42-7.37 (m, 5H), 7.29-7.23 (m, 5H), 2.39 (s, 3H); <sup>13</sup>C NMR (100 MHz, CDCl<sub>3</sub>)  $\delta$  192.7, 144.5, 143.3, 134.8, 134.2, 131.2, 130.3, 130.1, 130.0, 129.8, 128.7, 128.4, 128.3, 122.8, 121.0, 100.6, 87.2, 21.5. IR (neat, cm<sup>-1</sup>): 3058, 2921, 1659, 1603, 1264, 1179, 757, 689. Anal. Calcd for C<sub>24</sub>H<sub>18</sub>O: C 89.41; H 5.63. Found: C 89.50; H 5.53.

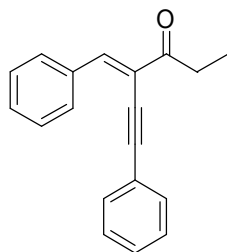

(*E*)-4-benzylidene-6-phenylhex-5-yn-3-one (**1i**). <sup>1</sup>H NMR (400 MHz, CDCl<sub>3</sub>)  $\delta$  8.10-8.08 (dd,  $J$  = 2.0 Hz, 7.2 Hz, 2H), 7.85 (s, 1H), 7.56-7.54 (m, 2H), 7.44-7.39 (m, 6H), 3.08-3.02 (dd,  $J$  = 7.2 Hz, 14.4 Hz, 2H), 1.22-1.19 (t,  $J$  = 7.2 Hz, 3H); <sup>13</sup>C NMR (100 MHz, CDCl<sub>3</sub>)  $\delta$  198.9, 142.6, 134.6, 131.3, 130.7, 130.6, 128.9, 128.6, 128.5, 122.8, 119.6, 99.0, 86.7, 33.7, 8.2. IR (neat, cm<sup>-1</sup>): 3376, 2934, 1696, 1141, 755, 689. Anal. Calcd for C<sub>19</sub>H<sub>16</sub>O: C 87.66; H 6.19. Found: C 87.58; H 6.10.

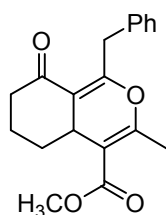

Methyl 1-benzyl-5,6,7,8-tetrahydro-3-methyl-8-oxo-4a*H*-isochromene-4-carboxylate (**2aa**). <sup>1</sup>H NMR (400 MHz, CDCl<sub>3</sub>)  $\delta$  7.34-7.21 (m, 5H), 3.87-3.83 (d,  $J$  = 14.0 Hz, 1H), 3.75-3.68 (m, 4H), 3.49-3.45 (dd,  $J$  = 4.0, 12.0 Hz, 1H), 2.56-2.51 (m, 1H), 2.49-2.35 (m, 1H), 2.17-2.11 (m, 4H), 1.91-1.84 (m, 2H), 1.61-1.51 (m, 1H); <sup>13</sup>C NMR (100 MHz, CDCl<sub>3</sub>)  $\delta$  201.4, 167.5, 157.2, 153.3, 137.2, 128.9, 128.3, 126.5, 113.7, 106.5, 51.3, 40.9, 35.9, 33.3, 31.7, 21.3, 18.5. IR (neat, cm<sup>-1</sup>): 3298, 2928, 1708, 763, 700. Anal. Calcd for C<sub>19</sub>H<sub>20</sub>O<sub>4</sub>: C 73.06; H 6.45. Found: C 73.15; H 6.36.

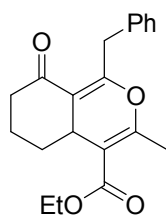

Ethyl 1-benzyl-5,6,7,8-tetrahydro-3-methyl-8-oxo-4a*H*-isochromene-4-carboxylate (**2ab**). <sup>1</sup>H NMR (400 MHz, CDCl<sub>3</sub>)  $\delta$  7.33-7.21 (m, 5H), 4.25-4.16 (m, 2H), 3.86-3.83 (d,  $J$  = 14.0 Hz, 1H), 3.72-3.69 (d,  $J$  = 14.0 Hz, 1H), 3.50-3.47 (m, 1H), 2.56-2.49 (m, 2H), 2.44-1.90 (m, 4H), 1.88-1.85 (m, 2H), 1.62-1.55 (m, 1H), 1.30-1.26 (t,  $J$  = 7.2 Hz, 3H); <sup>13</sup>C NMR (100 MHz, CDCl<sub>3</sub>)  $\delta$  201.4, 167.1, 156.8, 153.5, 137.3, 129.0, 128.3, 126.5, 113.7, 106.8, 60.2, 41.0, 36.0, 33.3, 31.7, 21.3, 18.5, 14.2. IR (neat, cm<sup>-1</sup>): 3394, 2938, 1740, 1681, 1163, 736, 702. Anal. Calcd for C<sub>20</sub>H<sub>22</sub>O<sub>4</sub>: C 73.60; H

6.79. Found: C 73.69; H 6.69.

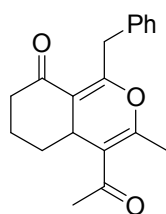

4-Acetyl-1-benzyl-4a,5,6,7-tetrahydro-3-methylisochromen-8-one (**2ac**).  $^1\text{H}$  NMR (400 MHz,  $\text{CDCl}_3$ )  $\delta$  7.35-7.21 (m, 5H), 3.88-3.84 (d,  $J = 14.0$  Hz, 1H), 3.70-3.67 (d,  $J = 14.0$  Hz, 1H), 3.56-3.53 (m, 1H), 2.58-2.37 (m, 2H), 2.24 (s, 3H), 1.99 (s, 3H), 1.95-1.86 (m, 3H), 1.64-1.58 (m, 1H);  $^{13}\text{C}$  NMR (100 MHz,  $\text{CDCl}_3$ )  $\delta$  200.9, 199.9, 153.8, 153.3, 137.1, 128.9, 128.3, 126.5, 115.7, 113.4, 41.0, 36.0, 33.8, 32.1, 29.2, 21.5, 18.3. IR (neat,  $\text{cm}^{-1}$ ): 3384, 2931, 1717, 1678, 1176, 1083, 701. Anal. Calcd for  $\text{C}_{19}\text{H}_{20}\text{O}_3$ : C 77.00; H 6.80. Found: C 77.09; H 6.77.

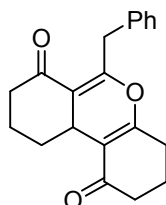

6-Benzyl-3,4,8,9,10,10a-hexahydro-2H-benzo[*c*]chromene-1,7-dione (**2ad**).  $^1\text{H}$  NMR (400 MHz,  $\text{CDCl}_3$ )  $\delta$  7.35-7.26 (m, 5H), 3.86-3.82 (d,  $J = 14.0$  Hz, 1H), 3.74-3.70 (d,  $J = 14.0$  Hz, 1H), 3.42-3.38 (m, 1H), 2.59-2.30 (m, 7H), 1.97-1.90 (m, 4H), 1.48-1.42 (m, 1H);  $^{13}\text{C}$  NMR (100 MHz,  $\text{CDCl}_3$ )  $\delta$  201.8, 197.6, 165.2, 152.8, 137.0, 129.0, 128.4, 126.6, 115.7, 114.1, 41.3, 37.1, 35.9, 31.0, 30.7, 27.1, 21.7, 20.1. IR (neat,  $\text{cm}^{-1}$ ): 3306, 2947, 1699, 1657, 1170, 1133, 724. Anal. Calcd for  $\text{C}_{20}\text{H}_{20}\text{O}_3$ : C 77.90; H 6.54. Found: C 77.79; H 6.46.

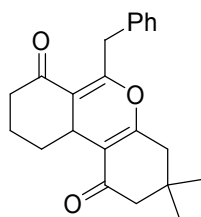

6-Benzyl-3,4,8,9,10,10a-hexahydro-3,3-dimethyl-2H-benzo[*c*]chromene-1,7-dione (**2ae**).  $^1\text{H}$  NMR (400 MHz,  $\text{CDCl}_3$ )  $\delta$  7.34-7.20 (m, 5H), 3.86 -3.82 (d,  $J = 14.0$  Hz, 1H), 3.74-3.70 (d,  $J = 14.0$  Hz, 1H), 3.43-3.39 (m, 1H), 2.59-2.52 (m, 2H), 2.43-2.37 (m, 1H), 2.36-2.18 (m, 4H), 1.96-1.88 (m, 2H), 1.48-1.43 (m, 1H), 1.01 (s, 3H), 1.00 (s, 3H);  $^{13}\text{C}$  NMR (100 MHz,  $\text{CDCl}_3$ )  $\delta$  201.8, 197.5, 163.4, 152.4, 137.1, 128.9, 128.3, 126.6, 115.6, 112.8, 51.0, 41.2, 40.7, 35.9, 31.7, 30.9, 30.5, 28.5, 27.9, 21.6. IR (neat,  $\text{cm}^{-1}$ ): 3305, 2958, 1700, 1387, 1162, 913, 728. Anal. Calcd for  $\text{C}_{22}\text{H}_{24}\text{O}_3$ : C 78.54; H 7.19. Found: C 78.61; H 7.25.

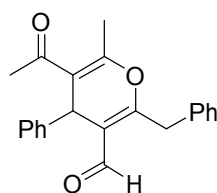

5-Acetyl-2-benzyl-6-methyl-4-phenyl-4*H*-pyran-3-carbaldehyde (**2ba**).  $^1\text{H}$  NMR (400 MHz,  $\text{CDCl}_3$ )  $\delta$  10.0, 7.34-7.22 (m, 10H), 4.86 (s, 1H), 4.05-4.02 (d,  $J = 15.2$  Hz, 1H), 3.93-3.90 (d,  $J = 15.2$  Hz, 1H), 2.34 (s, 3H), 2.15 (s, 3H);  $^{13}\text{C}$  NMR (100 MHz,  $\text{CDCl}_3$ )  $\delta$  198.9, 187.8, 164.4, 157.3, 143.3, 135.4, 128.8, 128.6, 128.4, 128.3, 127.3, 127.1, 118.8, 115.8, 35.9, 34.8, 29.6, 18.7. IR (neat,  $\text{cm}^{-1}$ ): 3313, 3029, 1663, 1160, 949, 702. Anal. Calcd for  $\text{C}_{22}\text{H}_{20}\text{O}_3$ : C 79.50; H 6.06. Found: C 79.60; H 6.15.

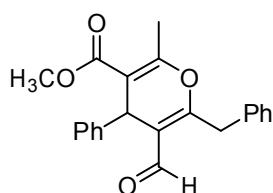

Methyl 6-benzyl-5-formyl-2-methyl-4-phenyl-4*H*-pyran-3-carboxylate (**2bb**).  $^1\text{H}$  NMR (400 MHz,  $\text{CDCl}_3$ )  $\delta$  9.98, 7.34-7.13 (m, 10H), 4.85 (s, 1H), 4.03-3.99 (d,  $J = 14.8$  Hz, 1H), 3.95-3.91 (d,  $J = 14.8$  Hz, 1H), 3.59 (s, 3H), 2.35 (s, 3H);  $^{13}\text{C}$  NMR (100 MHz,  $\text{CDCl}_3$ )  $\delta$  187.8, 166.5, 164.3, 144.1, 135.5, 128.7, 128.4, 128.1, 128.1, 127.2, 126.7, 118.4, 108.8, 51.4, 35.2, 34.7, 18.3. IR (neat,  $\text{cm}^{-1}$ ): 3427, 1714, 1699, 1161, 1087, 700. Anal. Calcd for  $\text{C}_{22}\text{H}_{20}\text{O}_4$ : C 75.84; H 5.79. Found: C 75.80; H 5.71.

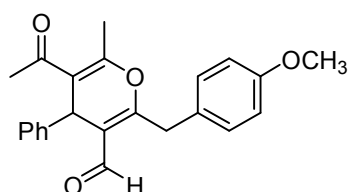

2-(4-Methoxybenzyl)-5-acetyl-6-methyl-4-phenyl-4*H*-pyran-3-carbaldehyde (**2ca**).  $^1\text{H}$  NMR (400 MHz,  $\text{CDCl}_3$ )  $\delta$  9.99 (s, 1H), 7.26-7.19 (m, 4H), 7.18-7.15 (dd,  $J = 4.0$ , 8.4 Hz, 1H), 7.13-7.11 (d,  $J = 8.8$  Hz, 2H), 6.86-6.84 (d,  $J = 8.8$  Hz, 2H), 4.84 (s, 1H), 3.97-3.93 (d,  $J = 14.8$  Hz, 1H), 3.85-3.81 (d,  $J = 14.8$  Hz, 1H), 3.79 (s, 3H), 2.32 (s, 3H), 2.13 (s, 3H);  $^{13}\text{C}$  NMR (100 MHz,  $\text{CDCl}_3$ )  $\delta$  198.9, 187.8, 164.8, 158.8, 157.2, 143.4, 129.4, 128.6, 128.3, 127.3, 127.0, 118.6, 115.8, 114.3, 55.2, 35.9, 34.0, 29.6, 18.7. IR (neat,  $\text{cm}^{-1}$ ): 3420, 2928, 1660, 1249, 1158, 700. Anal. Calcd for  $\text{C}_{23}\text{H}_{22}\text{O}_4$ : C 76.22; H 6.12. Found: C 76.28; H 6.18.

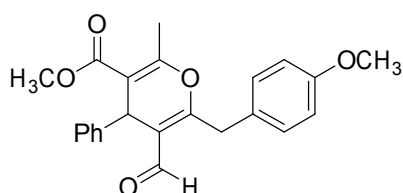

Methyl 6-(4-methoxybenzyl)-5-formyl-2-methyl-4-phenyl-4*H*-pyran-3-carboxylate (**2cb**).  $^1\text{H}$  NMR (400 MHz,  $\text{CDCl}_3$ )  $\delta$  9.98 (s, 1H), 7.24-7.22 (d,  $J = 6.0$  Hz, 4H), 7.15-7.14 (d,  $J = 8.4$  Hz, 3H), 6.86-6.84 (d,  $J = 8.4$  Hz, 2H), 4.83 (s, 1H), 3.97-3.93 (m, 2H), 3.78 (s, 3H), 3.61 (s, 3H), 2.35 (s, 3H);  $^{13}\text{C}$  NMR (100 MHz,  $\text{CDCl}_3$ )  $\delta$  187.8,

166.6, 164.8, 158.8, 158.6, 144.2, 129.4, 128.2, 128.1, 127.4, 126.6, 118.2, 114.2, 108.8, 55.2, 51.4, 35.2, 33.9, 18.4. IR (neat,  $\text{cm}^{-1}$ ): 3410, 2951, 1714, 1669, 1246, 1158, 1036, 732. Anal. Calcd for  $\text{C}_{23}\text{H}_{22}\text{O}_5$ : C 73.00; H 5.86. Found: C 73.07; H 5.79.

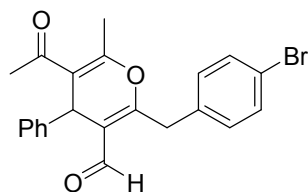

2-(4-Bromobenzyl)-5-acetyl-6-methyl-4-phenyl-4*H*-pyran-3-carbaldehyde (**2da**).  $^1\text{H}$  NMR (400 MHz,  $\text{CDCl}_3$ )  $\delta$  9.96 (s, 1H), 7.46-7.43 (d,  $J = 8.4$  Hz, 2H), 7.27-7.24 (m, 5H), 7.09-7.07 (d,  $J = 8.0$  Hz, 2H), 4.84 (s, 1H), 3.97-3.94 (d,  $J = 15.2$  Hz, 1H), 3.88-3.84 (d,  $J = 15.2$  Hz, 1H), 2.31 (s, 1H), 2.13 (s, 3H);  $^{13}\text{C}$  NMR (100 MHz,  $\text{CDCl}_3$ )  $\delta$  198.7, 187.6, 163.6, 157.1, 143.2, 134.4, 131.9, 130.1, 128.6, 128.2, 127.2, 121.3, 118.9, 115.8, 35.9, 34.2, 29.6, 18.7. IR (neat,  $\text{cm}^{-1}$ ): 3407, 2925, 1661, 1160, 1020, 800. Anal. Calcd for  $\text{C}_{22}\text{H}_{19}\text{BrO}_3$ : C 64.25; H 4.66. Found: C 64.28; H 4.58.

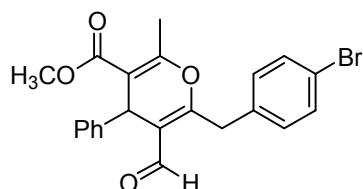

Methyl 6-(4-bromobenzyl)-5-formyl-2-methyl-4-phenyl-4*H*-pyran-3-carboxylate (**2db**).  $^1\text{H}$  NMR (400 MHz,  $\text{CDCl}_3$ )  $\delta$  9.95 (s, 1H), 7.47-7.44 (d,  $J = 8.4$  Hz, 2H), 7.25-7.21 (m, 5H), 7.12-7.10 (d,  $J = 8.4$  Hz, 2H), 4.84 (s, 1H), 3.99-3.89 (m, 2H), 3.62 (s, 3H), 2.35 (s, 3H);  $^{13}\text{C}$  NMR (100 MHz,  $\text{CDCl}_3$ )  $\delta$  187.7, 166.5, 163.5, 158.5, 144.0, 134.5, 131.9, 130.2, 128.2, 128.1, 126.8, 121.3, 118.7, 108.9, 51.5, 35.4, 34.2, 18.4. IR (neat,  $\text{cm}^{-1}$ ): 3430, 2949, 1714, 1670, 1161, 1080, 733. Anal. Calcd for  $\text{C}_{22}\text{H}_{19}\text{BrO}_4$ : C 61.84; H 4.48. Found: C 64.75; H 4.41.

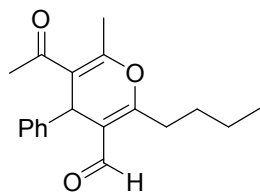

5-Acetyl-2-butyl-6-methyl-4-phenyl-4*H*-pyran-3-carbaldehyde (**2ea**).  $^1\text{H}$  NMR (400 MHz,  $\text{CDCl}_3$ )  $\delta$  9.83 (s, 1H), 7.26-7.17 (m, 5H), 4.80 (s, 1H), 2.69-2.58 (m, 2H), 2.39 (s, 3H), 2.14 (s, 3H), 1.66-1.60 (m, 2H), 1.39-1.34 (m, 2H), 0.94-0.91 (t,  $J = 7.2$  Hz, 3H);  $^{13}\text{C}$  NMR (100 MHz,  $\text{CDCl}_3$ )  $\delta$  199.0, 187.8, 167.1, 157.2, 143.6, 128.6, 128.2, 126.9, 118.3, 115.8, 35.8, 29.9, 29.6, 28.6, 22.1, 18.8, 13.7. IR (neat,  $\text{cm}^{-1}$ ): 3407, 2929, 1661, 1176, 1030, 747. Anal. Calcd for  $\text{C}_{19}\text{H}_{22}\text{O}_3$ : C 76.48; H 7.43. Found: C 76.59; H 7.49.

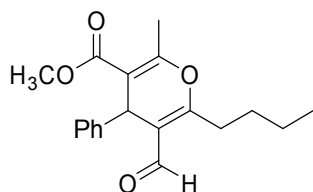

Methyl 6-butyl-5-formyl-2-methyl-4-phenyl-4*H*-pyran-3-carboxylate (**2eb**). <sup>1</sup>H NMR (400 MHz, CDCl<sub>3</sub>) δ 9.83 (s, 1H), 7.26-7.13 (m, 5H), 4.79 (s, 1H), 3.63 (s, 3H), 2.70-2.65 (m, 2H), 2.42 (s, 3H), 1.70-1.63 (m, 2H), 1.43-1.36 (m, 2H), 0.96-0.92 (t, *J* = 7.2 Hz, 3H); <sup>13</sup>C NMR (100 MHz, CDCl<sub>3</sub>) δ 187.8, 167.1, 166.8, 158.5, 144.4, 128.1, 128.1, 126.6, 118.9, 51.5, 35.1, 29.9, 28.5, 22.1, 18.4, 13.7. IR (neat, cm<sup>-1</sup>): 3399, 2956, 1715, 1669, 1175, 1039, 698. Anal. Calcd for C<sub>19</sub>H<sub>22</sub>O<sub>3</sub>: C 76.48; H 7.43. Found: C 76.58; H 7.36.

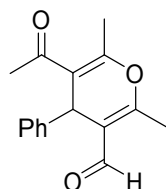

5-Acetyl-2,6-dimethyl-4-phenyl-4*H*-pyran-3-carbaldehyde (**2fa**). <sup>1</sup>H NMR (400 MHz, CDCl<sub>3</sub>) δ 9.83 (s, 1H), 7.27-7.16 (m, 5H), 4.79 (s, 1H), 2.39 (s, 3H), 2.29 (s, 3H), 2.13 (s, 3H); <sup>13</sup>C NMR (100 MHz, CDCl<sub>3</sub>) δ 199.1, 188.1, 163.3, 157.1, 143.5, 128.6, 128.3, 127.0, 118.3, 115.8, 35.8, 29.6, 18.9, 15.4. IR (neat, cm<sup>-1</sup>): 3433, 2925, 1660, 1194, 1022, 700. Anal. Calcd for C<sub>16</sub>H<sub>16</sub>O<sub>3</sub>: C 74.98; H 6.29. Found: C 74.88; H 6.37.

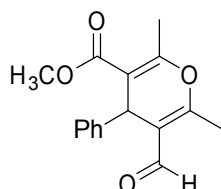

Methyl 5-formyl-2,6-dimethyl-4-phenyl-4*H*-pyran-3-carboxylate (**2fb**). <sup>1</sup>H NMR (400 MHz, CDCl<sub>3</sub>) δ 9.82 (s, 1H), 7.26-7.12 (m, 5H), 4.79 (s, 1H), 3.62 (s, 3H), 2.42 (s, 3H), 2.32 (s, 3H); <sup>13</sup>C NMR (100 MHz, CDCl<sub>3</sub>) δ 188.1, 166.7, 163.3, 158.3, 144.3, 128.1, 126.6, 117.9, 108.9, 51.4, 35.1, 18.5, 15.3. IR (neat, cm<sup>-1</sup>): 3416, 2925, 1714, 1670, 1192, 1021, 699. Anal. Calcd for C<sub>16</sub>H<sub>16</sub>O<sub>4</sub>: C 70.57; H 5.92. Found: C 70.68; H 5.84.

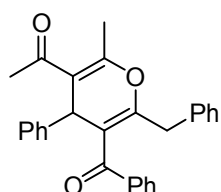

5-Acetyl-2-benzyl-6-methyl-4-phenyl-4*H*-pyran-3-benzaldehyde (**2ga**). <sup>1</sup>H NMR (400 MHz, CDCl<sub>3</sub>) δ 7.56-7.46 (m, 3H), 7.34-7.30 (t, *J* = 7.6 Hz, 2H), 7.24-7.05 (m, 10 H), 4.92 (s, 1H), 3.42-3.29 (m, 2H), 2.30 (s, 3H), 2.06 (s, 3H); <sup>13</sup>C NMR (100 MHz, CDCl<sub>3</sub>) δ 198.9, 197.2, 158.2, 150.6, 143.3, 138.4, 136.4, 132.9, 128.9, 128.7, 128.6, 128.4, 127.7, 127.2, 126.7, 117.2, 113.8, 41.9, 37.1, 29.6, 19.1. IR (neat, cm<sup>-1</sup>): 3397, 2961, 1693, 1598, 1209, 1026, 699. Anal. Calcd for C<sub>28</sub>H<sub>24</sub>O<sub>3</sub>: C 82.33; H 5.92. Found: C 82.27; H 5.88.



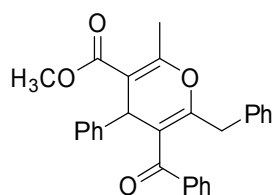

Methyl 6-benzyl-5-benzoyl-2-methyl-4-phenyl-4*H*-pyran-3-carboxylate (**2gb**).  $^1\text{H}$  NMR (400 MHz,  $\text{CDCl}_3$ )  $\delta$  7.60-7.58 (d,  $J = 8.4$  Hz, 2H), 7.48-7.46 (d,  $J = 7.6$  Hz, 1H), 7.36-7.32 (m, 2H), 7.25-7.07 (m, 10H), 4.86 (s, 1H), 3.55 (s, 3H), 3.49-3.38 (m, 2H), 2.34 (s, 3H);  $^{13}\text{C}$  NMR (100 MHz,  $\text{CDCl}_3$ )  $\delta$  196.9, 167.1, 159.7, 151.1, 143.9, 138.1, 136.6, 132.8, 128.8, 128.6, 128.5, 128.4, 128.3, 127.7, 126.8, 126.6, 117.1, 106.5, 51.3, 41.1, 37.0, 18.7. IR (neat,  $\text{cm}^{-1}$ ): 3400, 3028, 1714, 1164, 1088, 698. Anal. Calcd for  $\text{C}_{23}\text{H}_{24}\text{O}_4$ : C 79.22; H 5.70. Found: C 79.16; H 5.66.

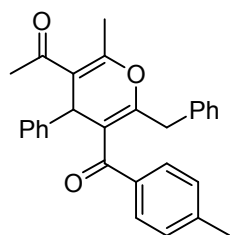

5-Acetyl-2-benzyl-6-methyl-4-phenyl-4*H*-pyran-3-(4-methylbenzaldehyde) (**2ha**).  $^1\text{H}$  NMR (400 MHz,  $\text{CDCl}_3$ )  $\delta$  7.48-7.45 (d,  $J = 8.0$  Hz, 2H), 7.25-7.18 (m, 6H), 7.15-7.05 (m, 6H), 4.91 (s, 1H), 3.43-3.28 (m, 2H), 2.35 (s, 3H), 2.29 (s, 3H), 2.06 (s, 3H);  $^{13}\text{C}$  NMR (100 MHz,  $\text{CDCl}_3$ )  $\delta$  198.9, 196.8, 158.3, 149.9, 143.9, 143.3, 136.5, 135.7, 129.3, 129.0, 128.8, 128.6, 128.3, 127.7, 127.1, 126.6, 117.2, 113.7, 41.9, 37.1, 29.6, 21.6, 19.1. IR (neat,  $\text{cm}^{-1}$ ): 3434, 2924, 1602, 1209, 1171, 1133, 737. Anal. Calcd for  $\text{C}_{29}\text{H}_{26}\text{O}_3$ : C 82.44; H 6.20. Found: C 82.38; H 6.14.

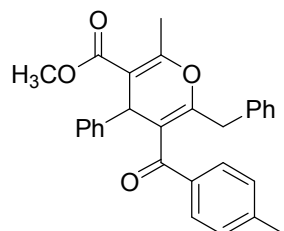

Methyl 6-benzyl-5-(4-methylbenzoyl)-2-methyl-4-phenyl-4*H*-pyran-3-carboxylate (**2hb**).  $^1\text{H}$  NMR (400 MHz,  $\text{CDCl}_3$ )  $\delta$  7.53-7.51 (d,  $J = 8.0$  Hz, 2H), 7.24-7.08 (m, 12H), 4.85 (s, 1H), 3.55 (s, 3H), 3.49-3.36 (m, 2H), 2.35 (s, 3H), 2.34 (s, 3H);  $^{13}\text{C}$  NMR (100 MHz,  $\text{CDCl}_3$ )  $\delta$  196.6, 167.2, 159.8, 150.4, 143.9, 143.8, 136.7, 135.5, 129.2, 129.1, 128.7, 128.4, 128.3, 127.7, 126.9, 126.6, 117.2, 106.4, 51.2, 41.2, 37.0, 21.6, 18.7. IR (neat,  $\text{cm}^{-1}$ ): 3409, 2981, 1685, 1179, 1044, 758. Anal. Calcd for  $\text{C}_{29}\text{H}_{26}\text{O}_4$ : C 79.43; H 5.98. Found: C 79.49; H 5.91.

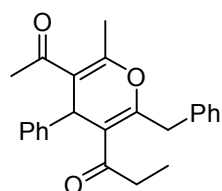

5-Acetyl-2-benzyl-6-methyl-4-phenyl-4*H*-pyran-3-propionaldehyde (**2ia**).  $^1\text{H}$  NMR

(400 MHz, CDCl<sub>3</sub>)  $\delta$  7.31-7.18 (m, 10H), 4.85 (s, 1H), 4.03-3.92 (m, 2H), 2.60-2.53 (m, 2H), 2.45-2.39 (m, 3H), 2.22-2.21 (d,  $J = 7.2$  Hz, 3H), 0.98-0.94 (t,  $J = 7.2$  Hz, 3H); <sup>13</sup>C NMR (100 MHz, CDCl<sub>3</sub>)  $\delta$  202.1, 198.0, 157.1, 156.0, 144.1, 137.0, 128.9, 128.8, 128.7, 128.5, 128.0, 127.1, 126.7, 117.2, 39.2, 37.1, 34.8, 30.6, 19.4, 7.9. IR (neat, cm<sup>-1</sup>): 3432, 2927, 1689, 1597, 1183, 1027, 701. Anal. Calcd for C<sub>24</sub>H<sub>24</sub>O<sub>3</sub>: C 79.97; H 6.71. Found: C 79.90; H 6.80.

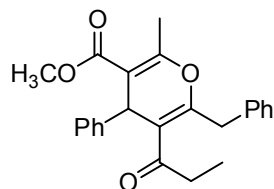

Methyl 6-benzyl-5-propionyl-2-methyl-4-phenyl-4*H*-pyran-3-carboxylate (**2ib**). <sup>1</sup>H NMR (400 MHz, CDCl<sub>3</sub>)  $\delta$  7.36-7.17 (m, 10H), 4.81 (s, 1H), 4.07-3.98 (m, 2H), 3.67 (s, 3H), 2.65-2.55 (m, 1H), 2.42-2.32 (m, 1H), 2.25 (s, 3H), 0.97-0.94 (t,  $J = 7.2$  Hz, 3H); <sup>13</sup>C NMR (100 MHz, CDCl<sub>3</sub>)  $\delta$  201.9, 167.1, 158.7, 156.9, 144.4, 137.3, 128.9, 128.6, 128.4, 128.1, 127.0, 126.6, 116.2, 108.3, 51.4, 38.9, 37.0, 34.4, 18.8, 7.85. IR (neat, cm<sup>-1</sup>): 3406, 2942, 1697, 1603, 1186, 1076, 701. Anal. Calcd for C<sub>24</sub>H<sub>24</sub>O<sub>4</sub>: C 76.57; H 6.43. Found: C 76.66; H 6.50.

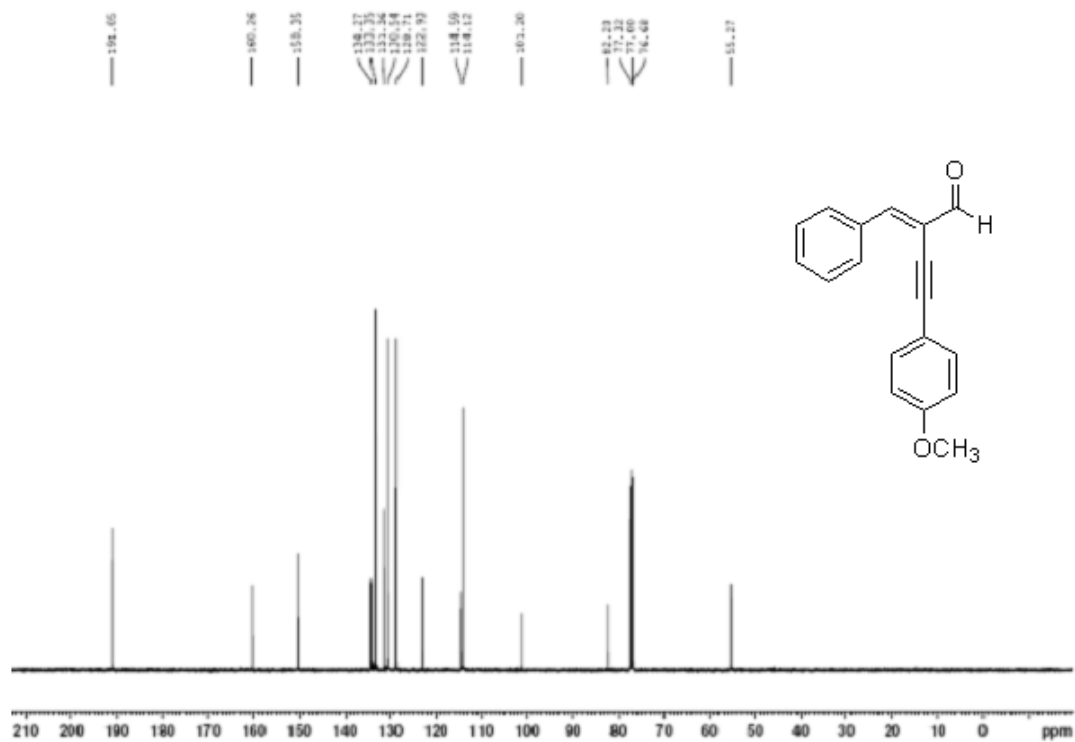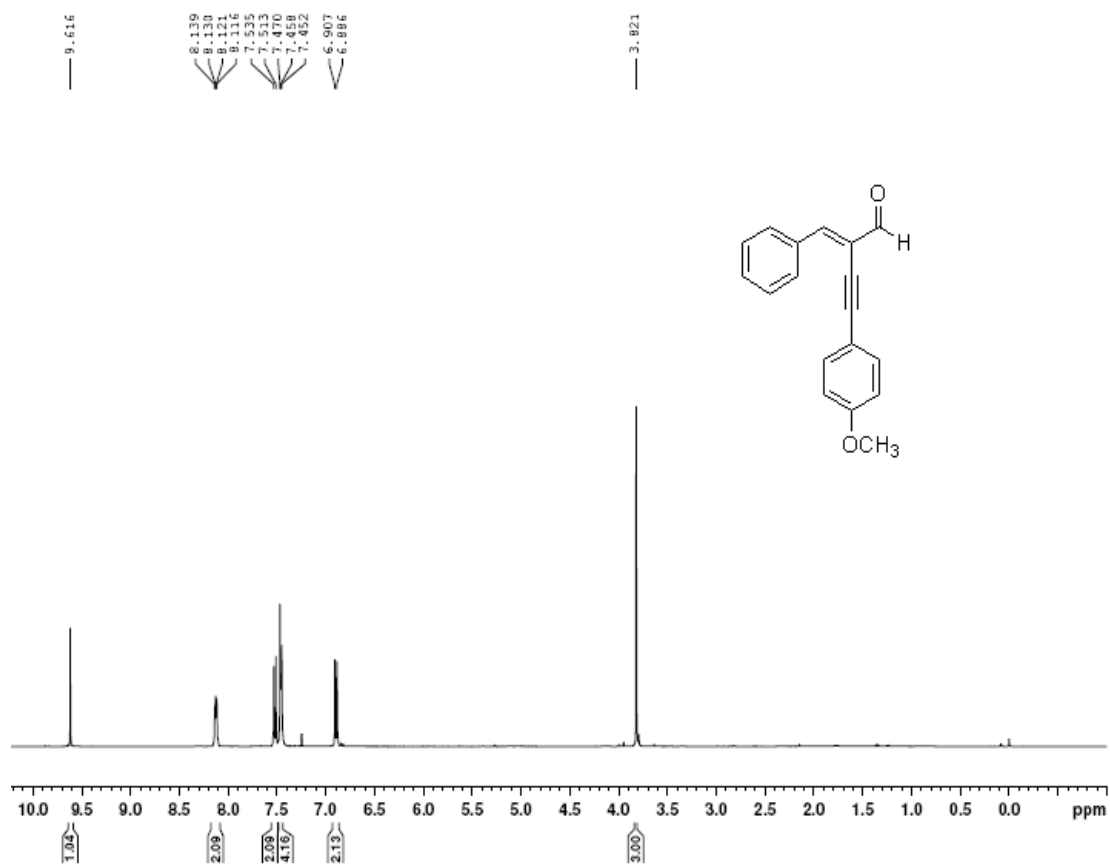

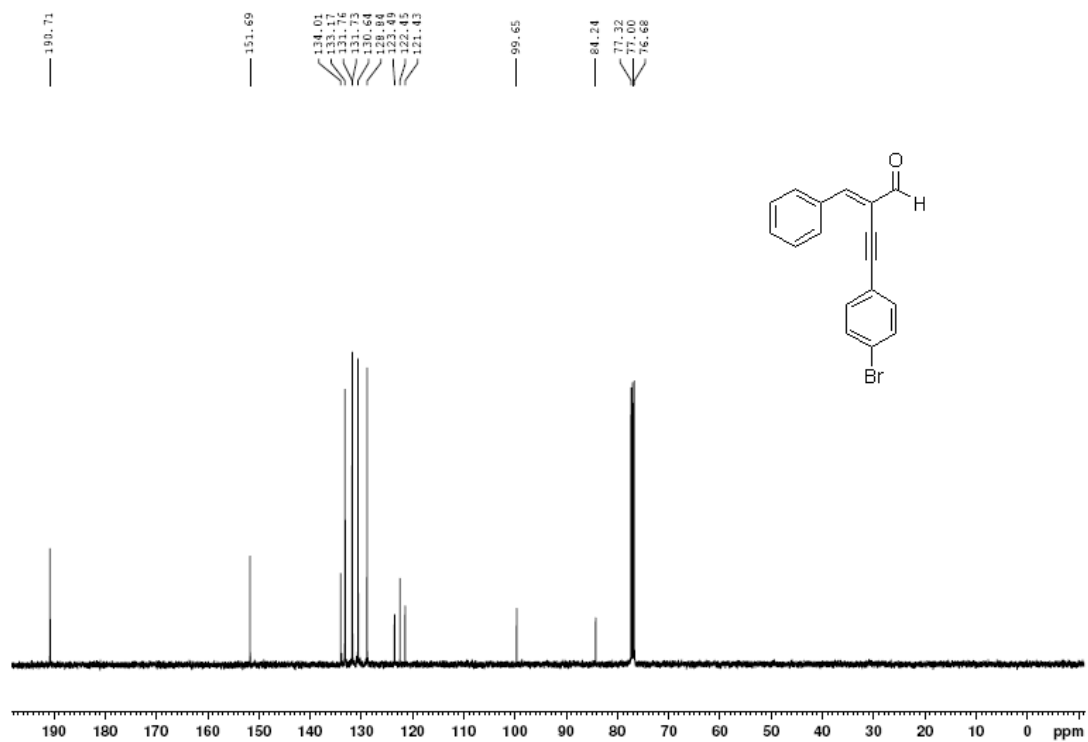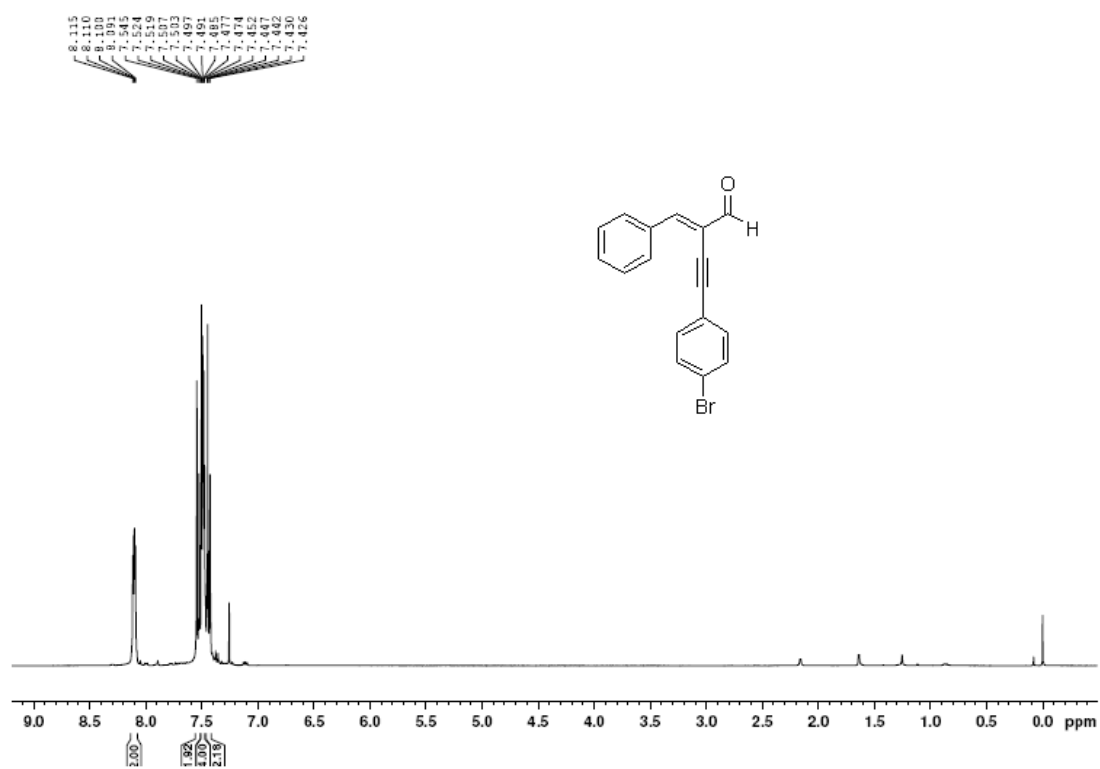

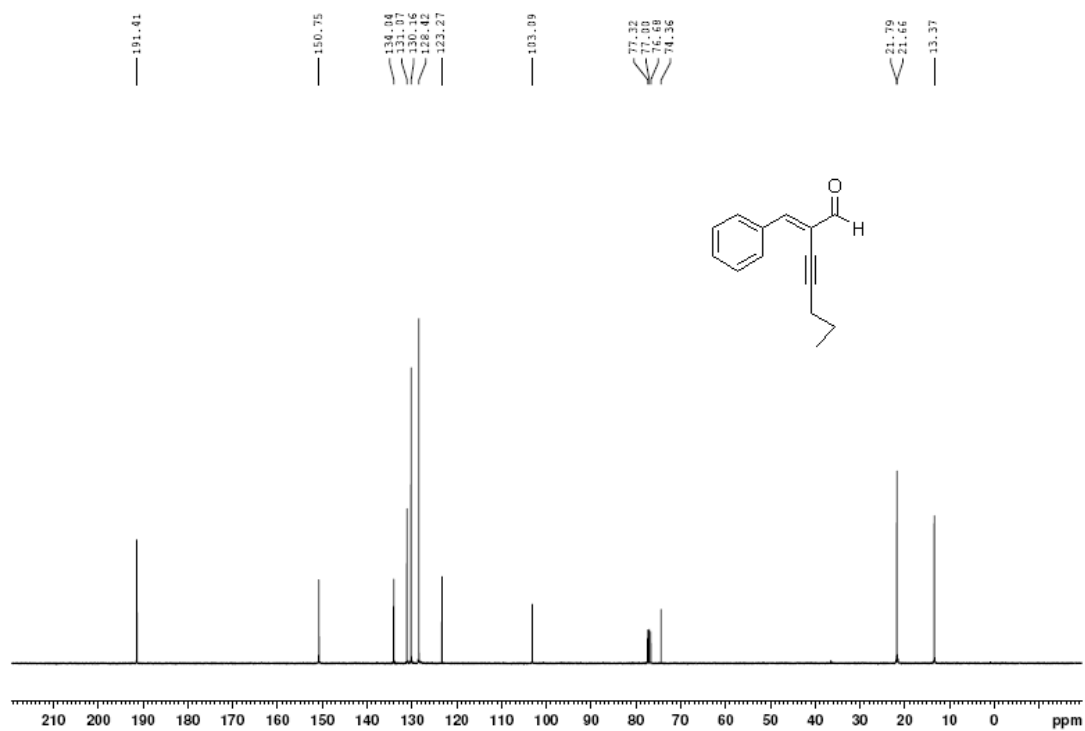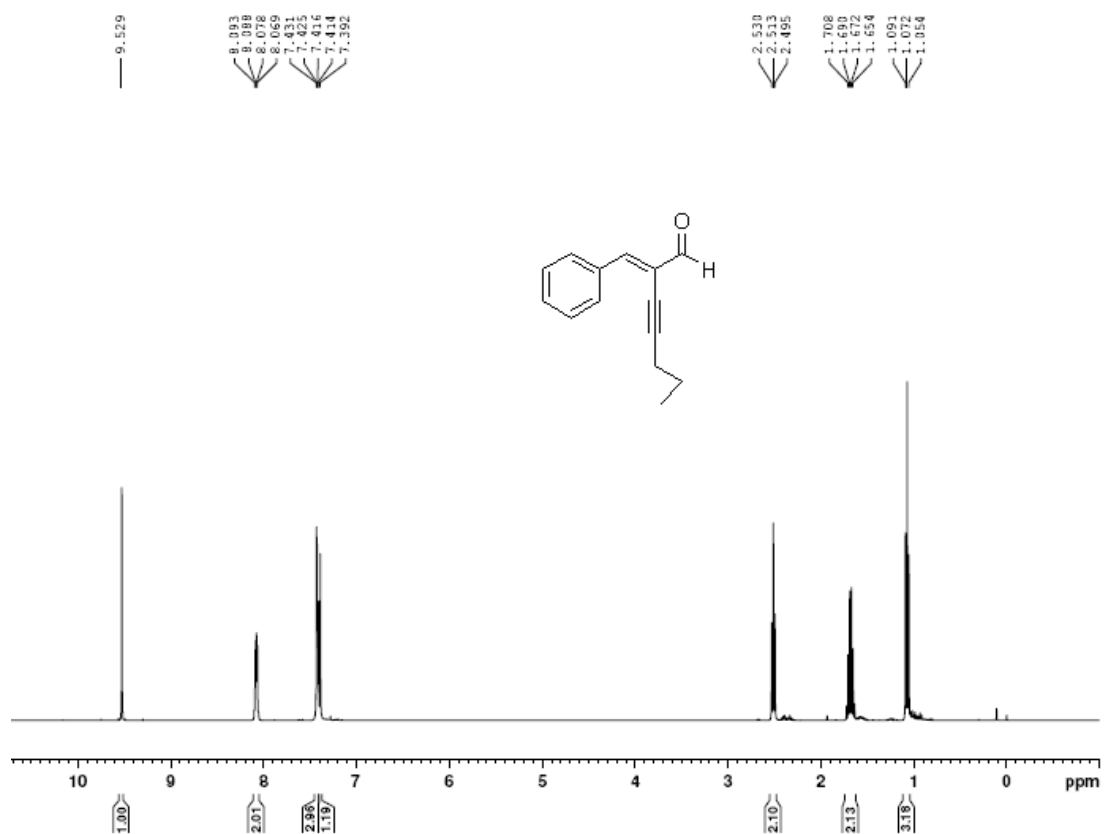

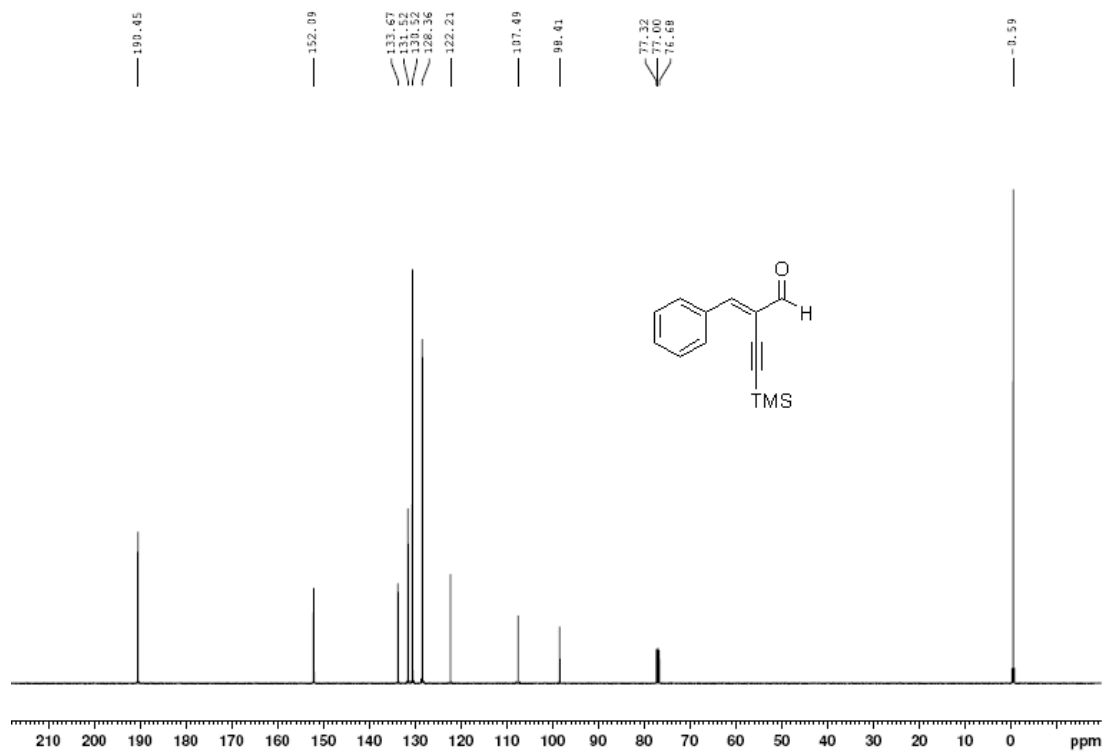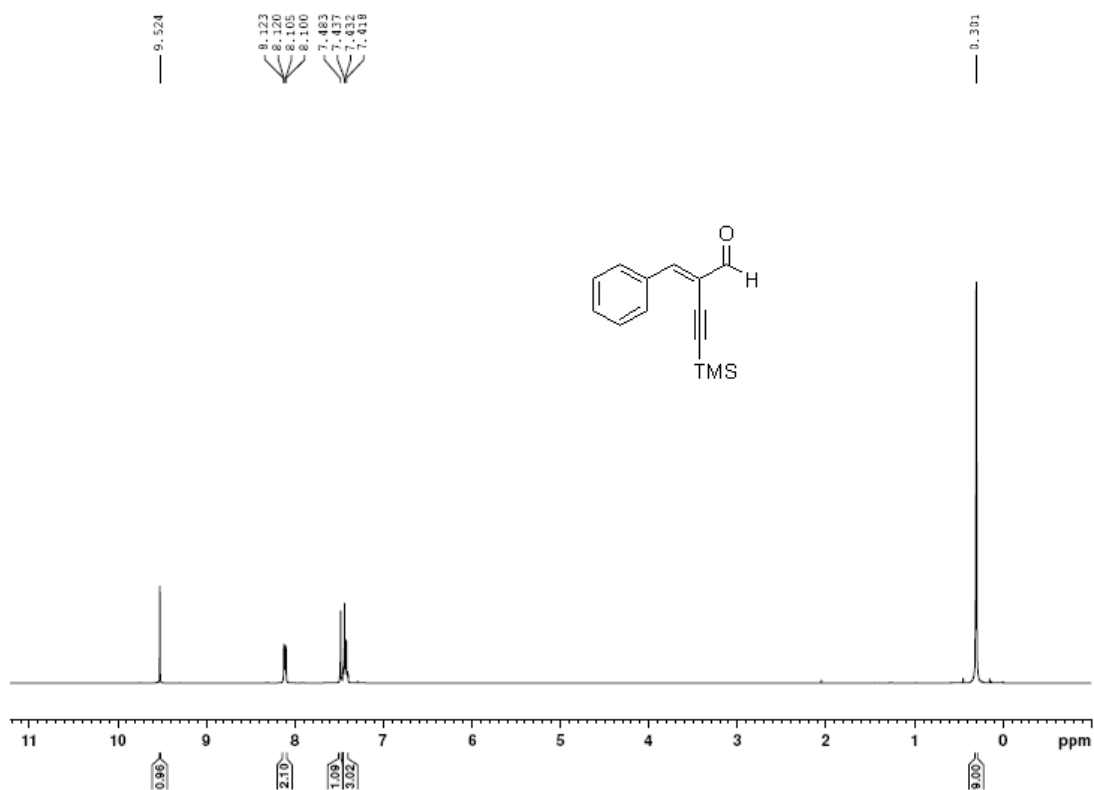

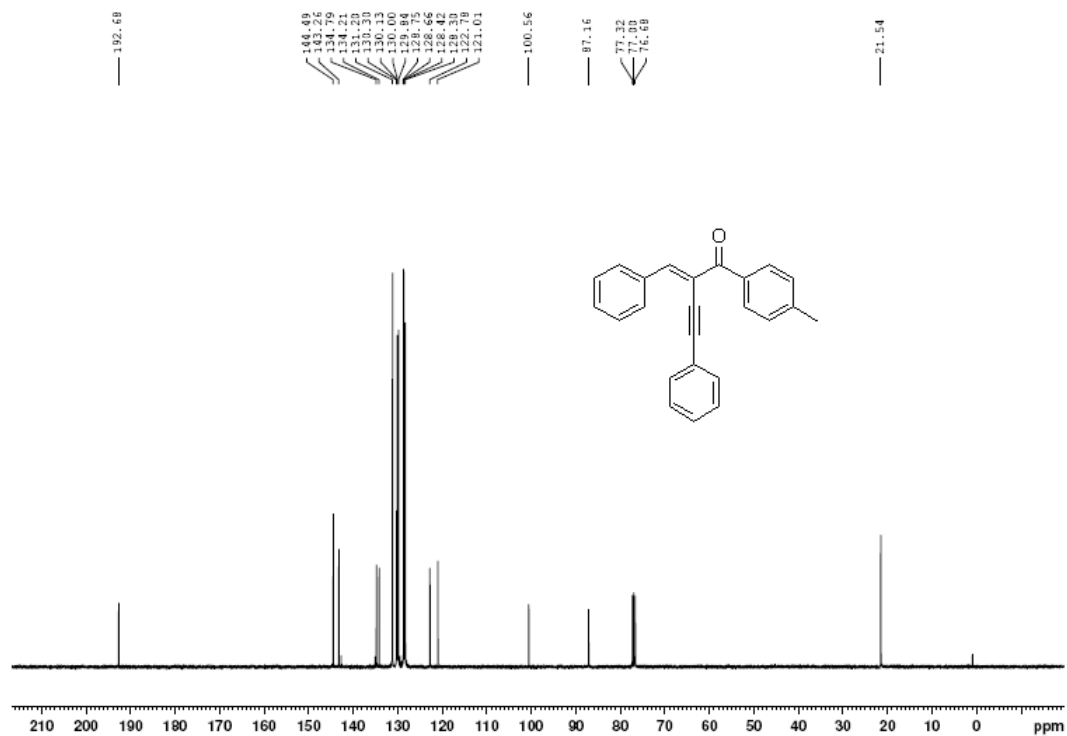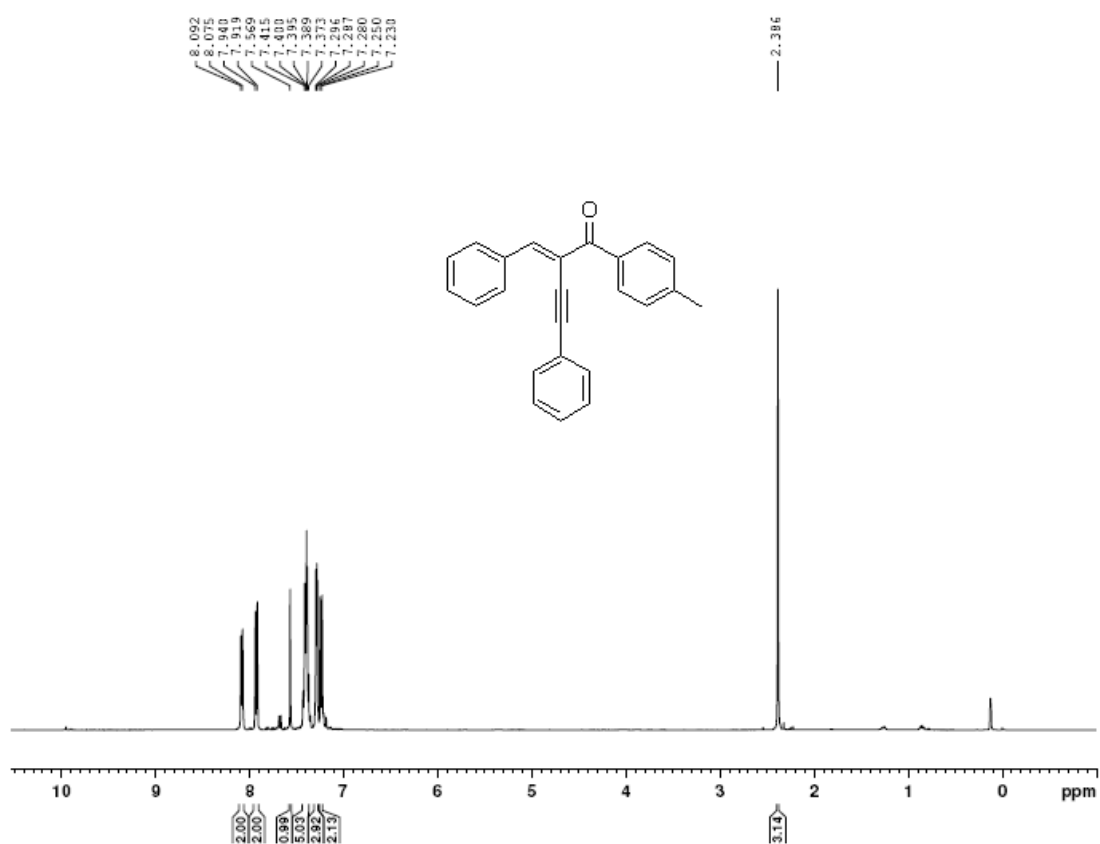

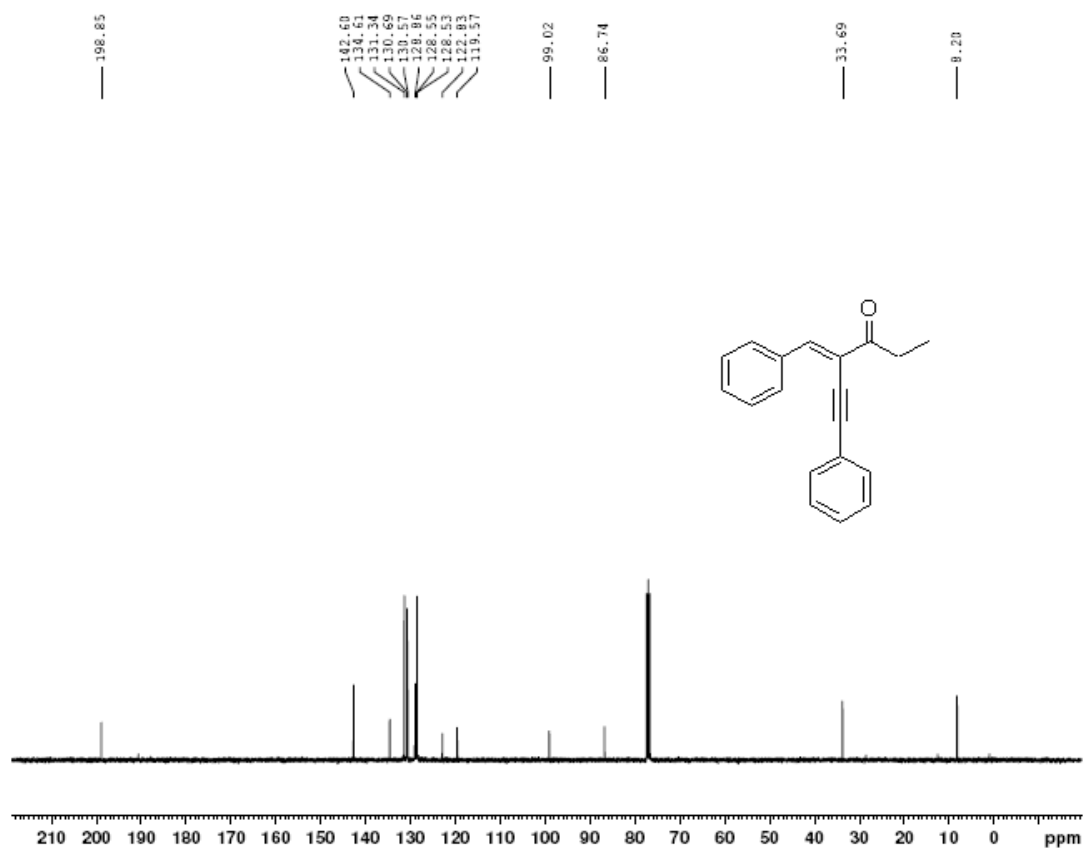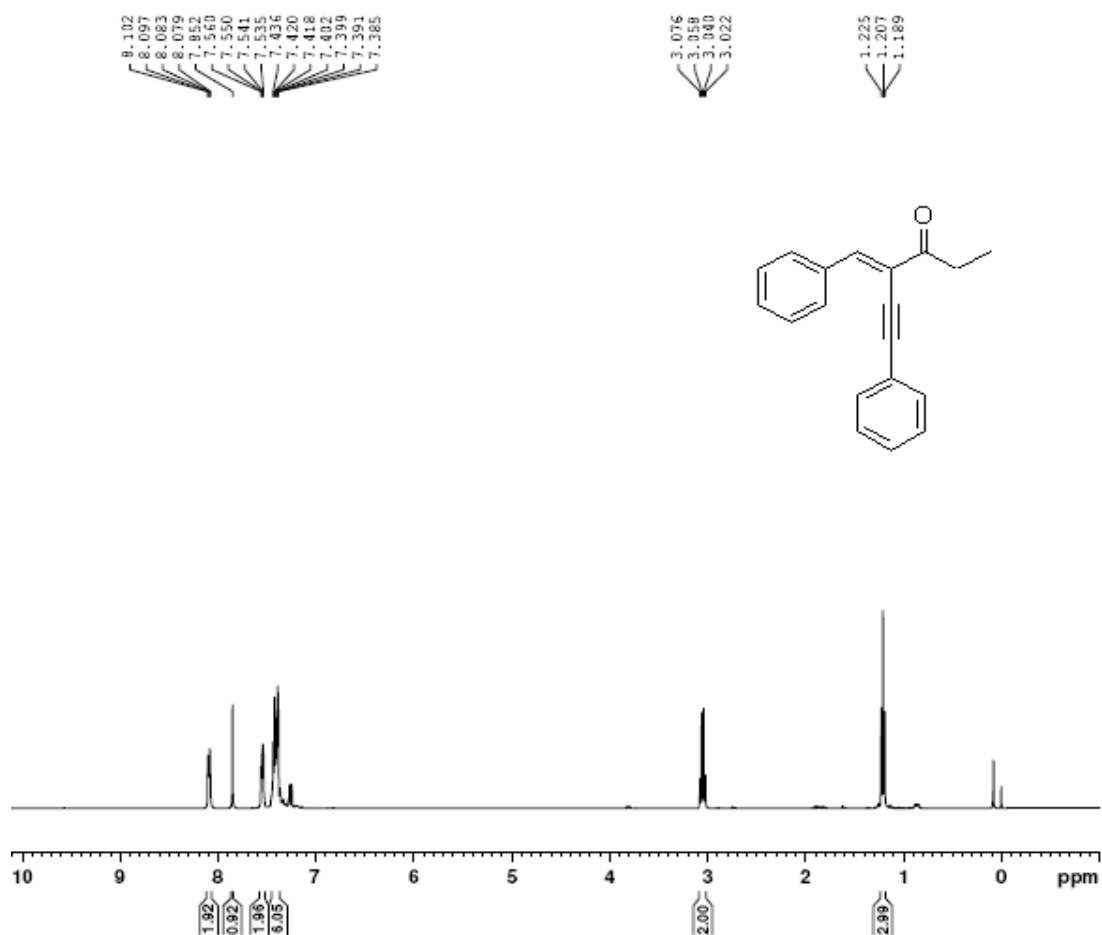



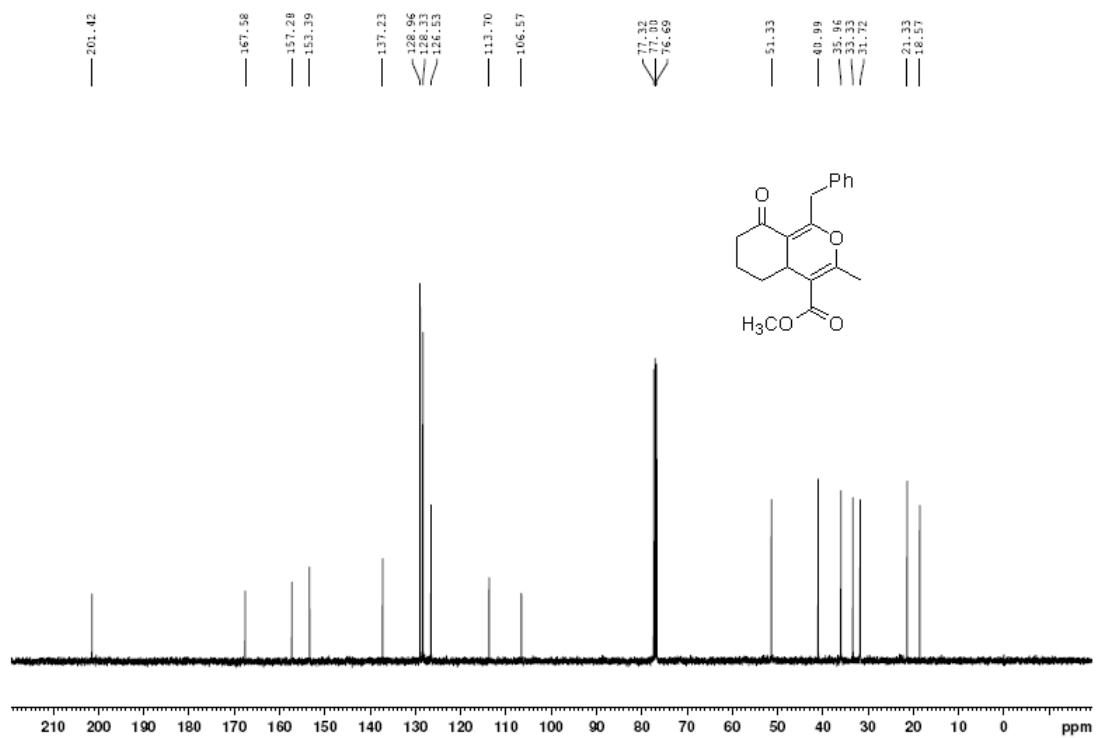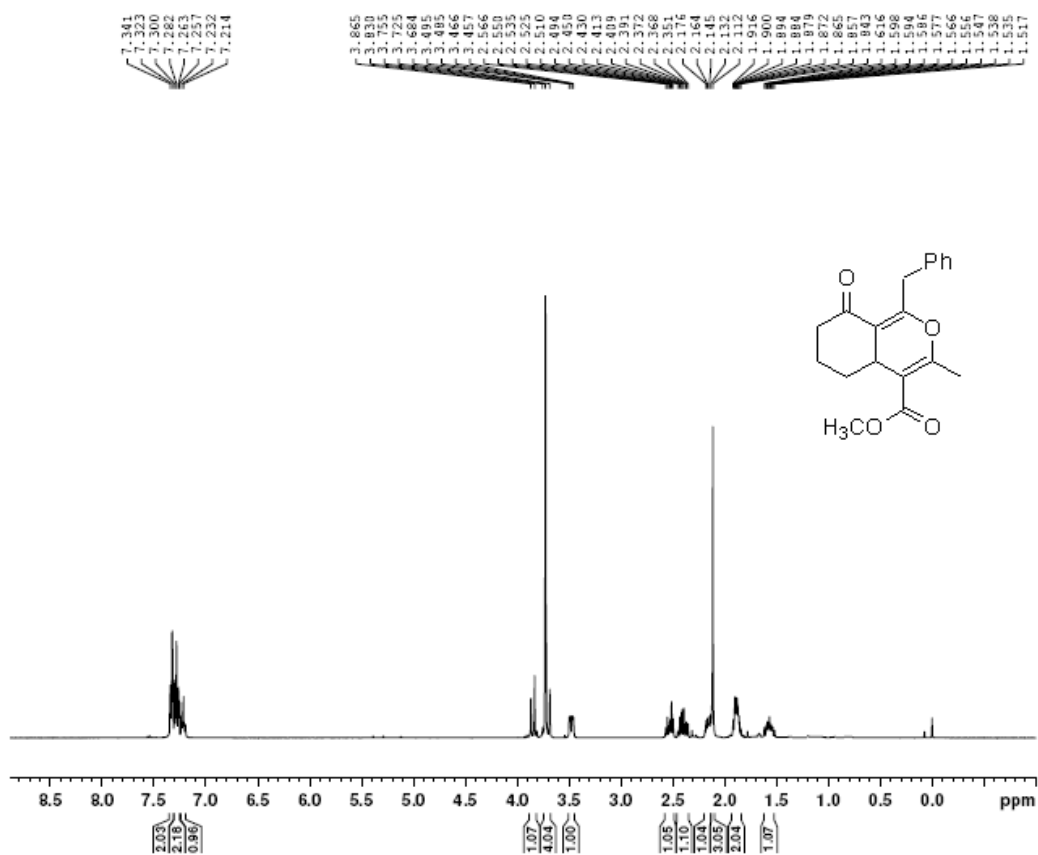

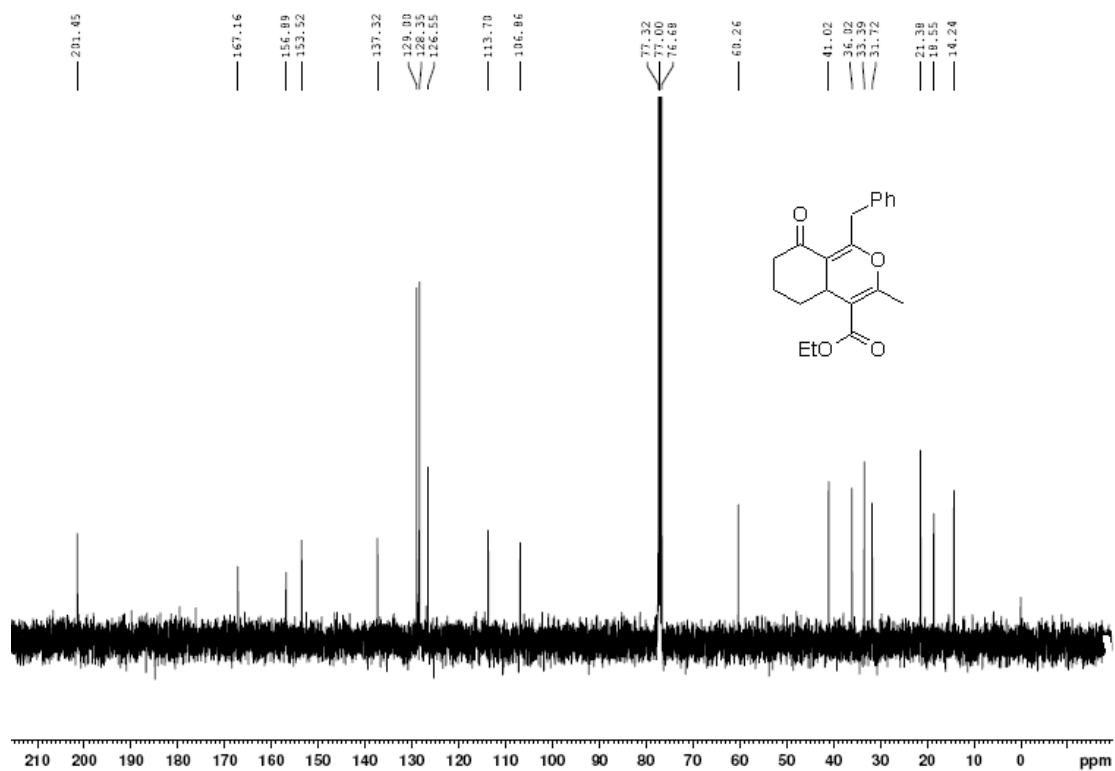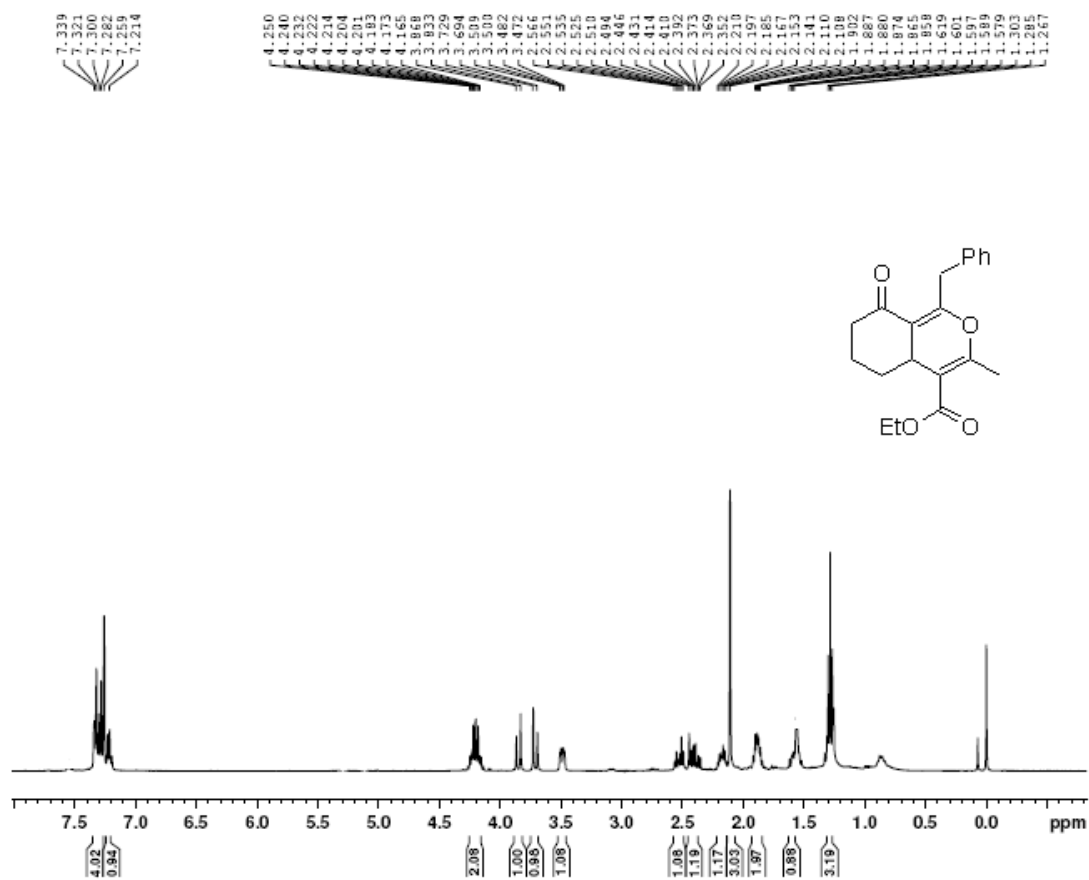

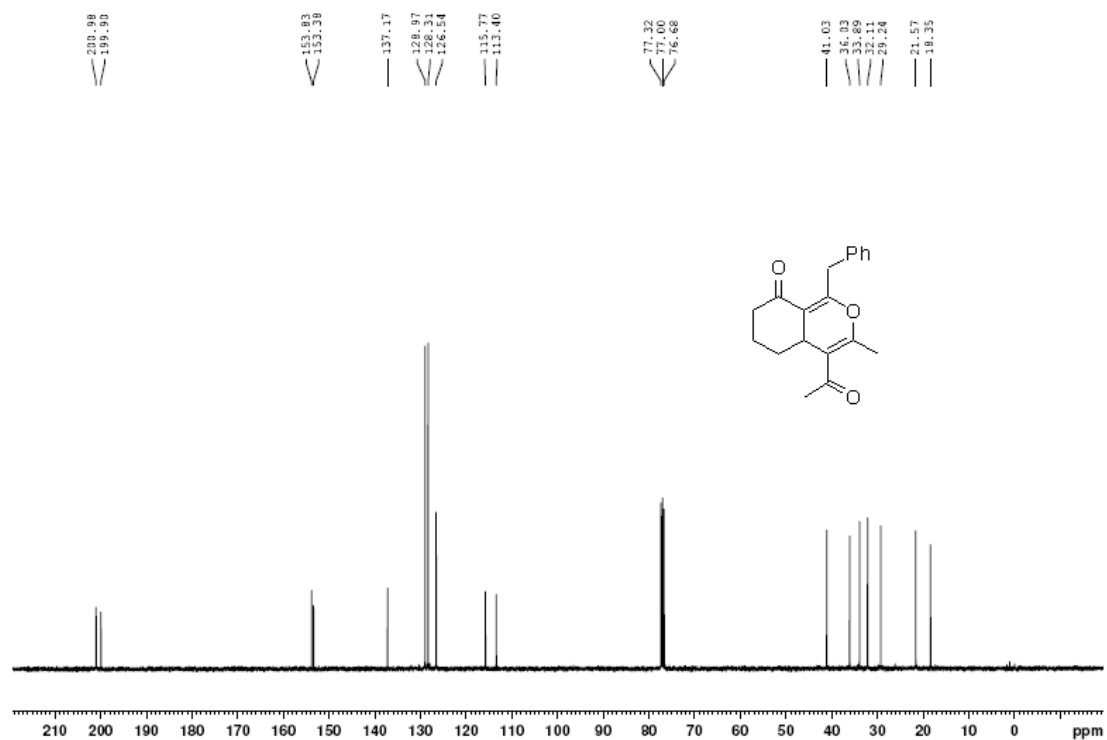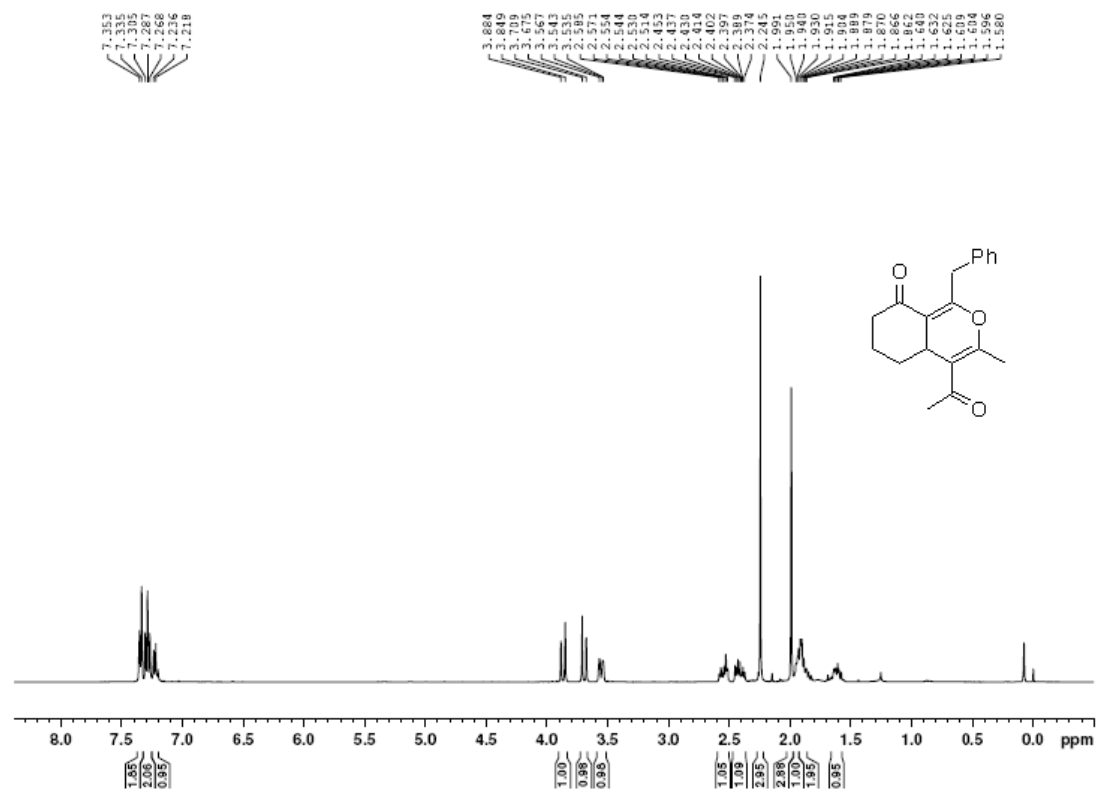

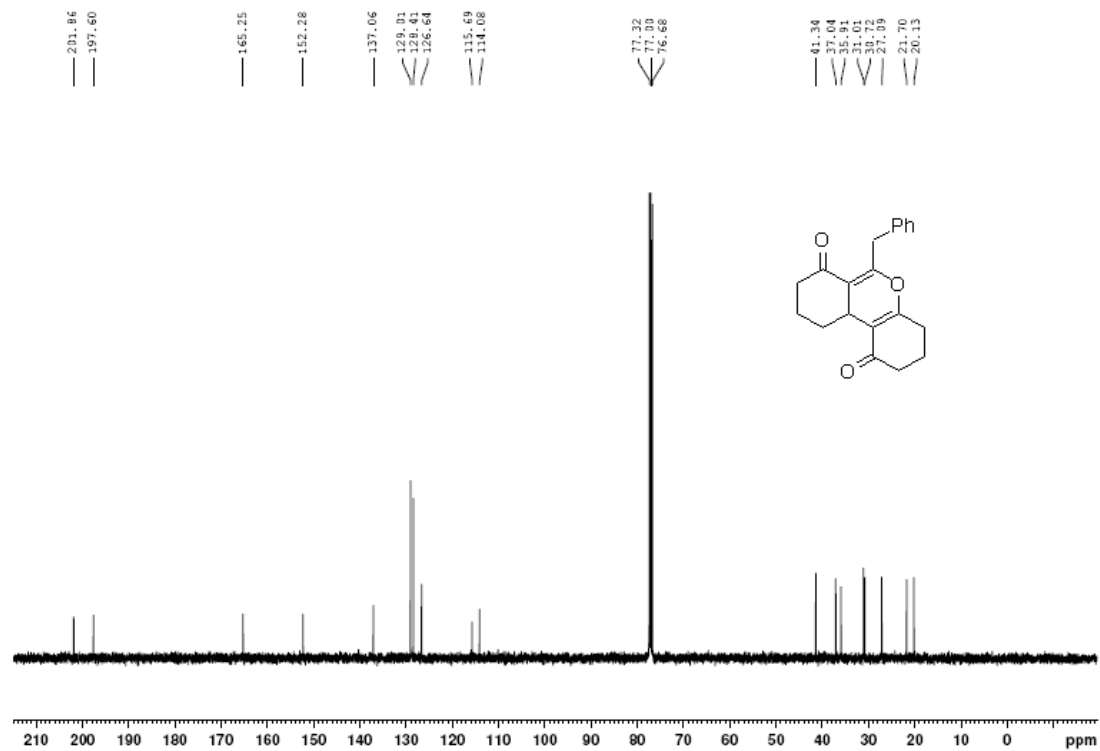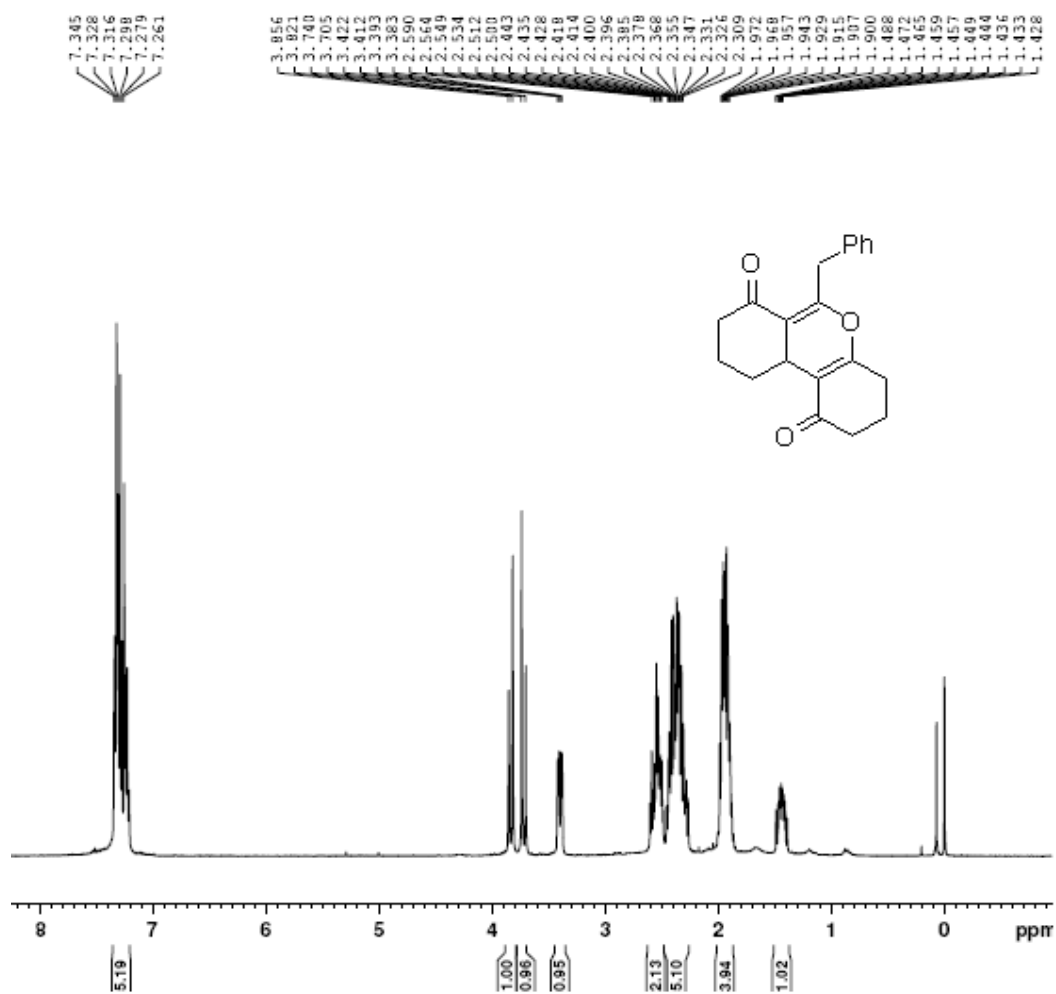

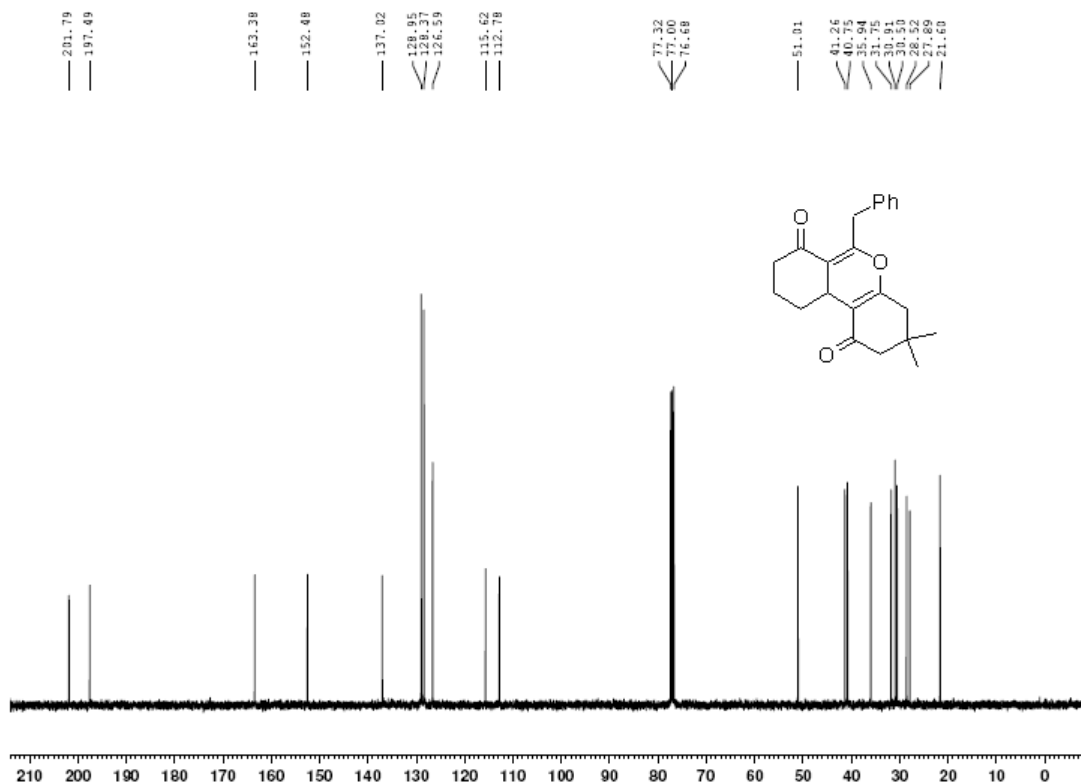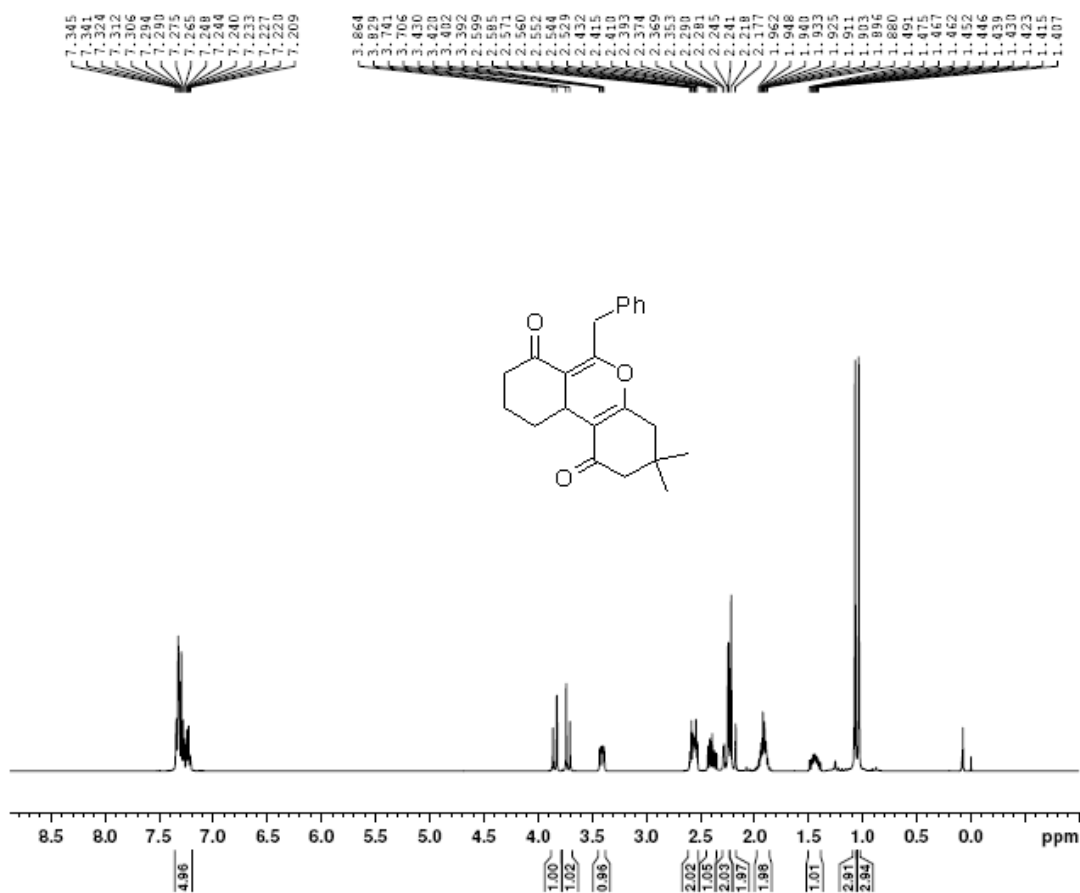

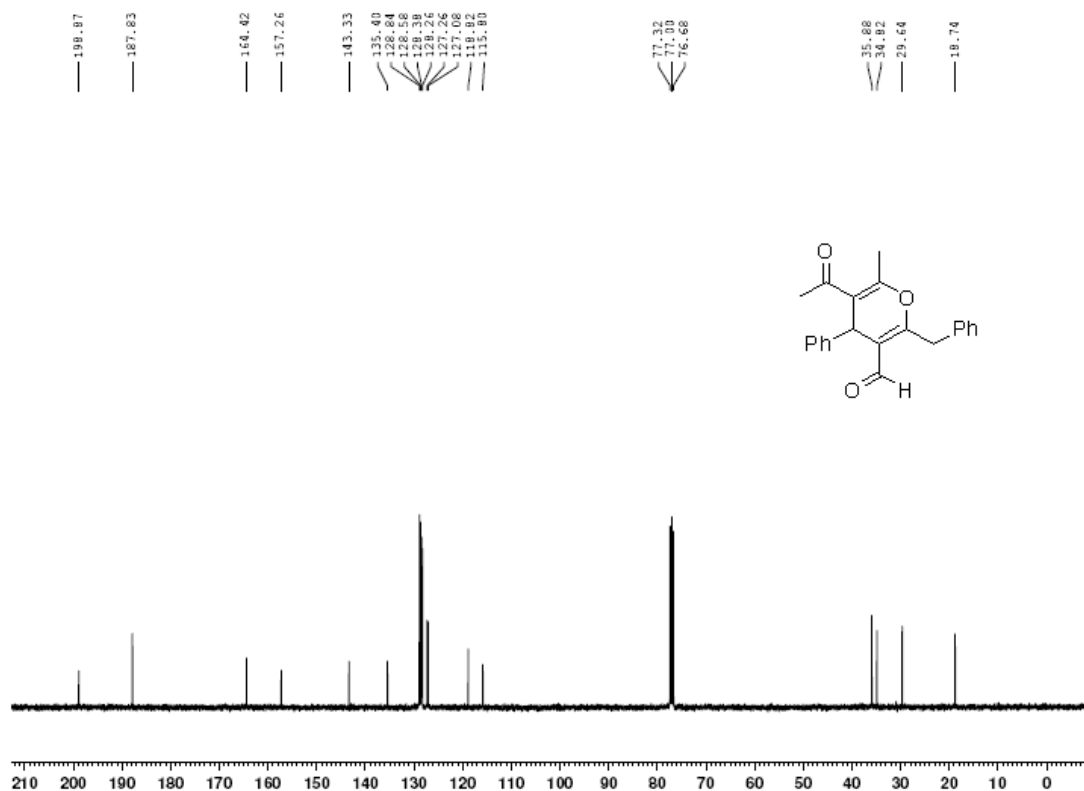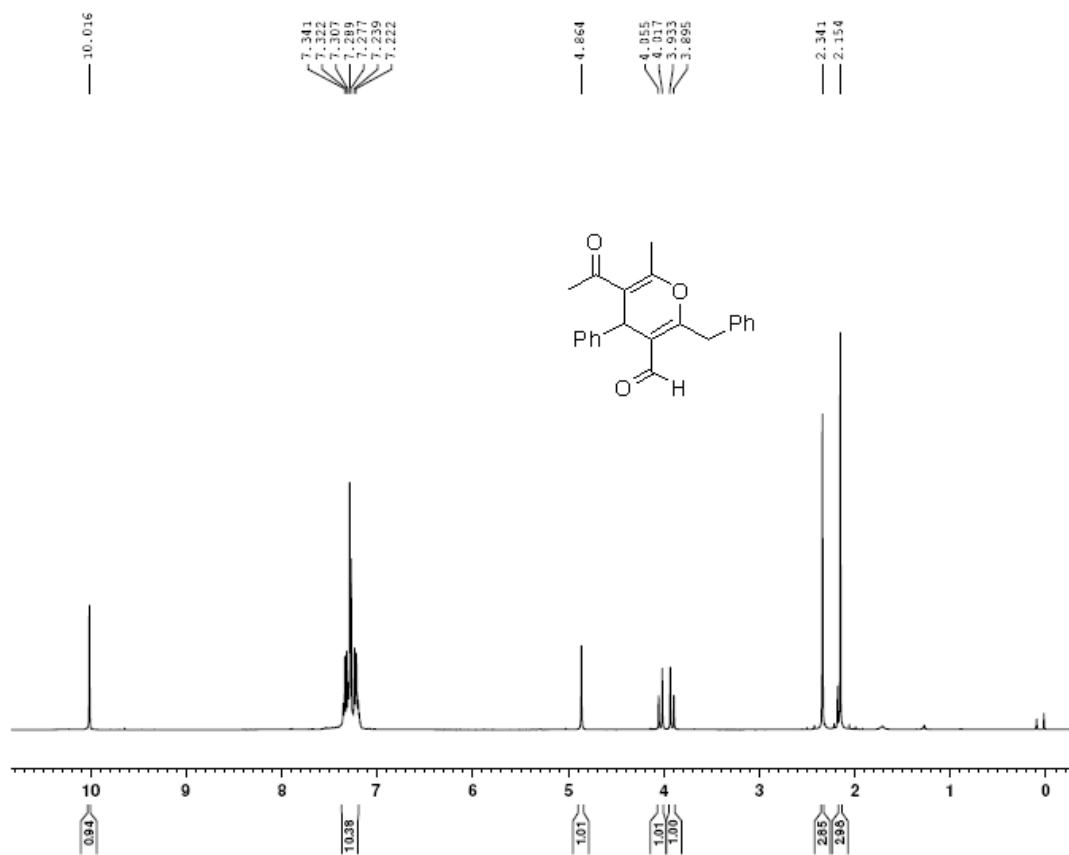

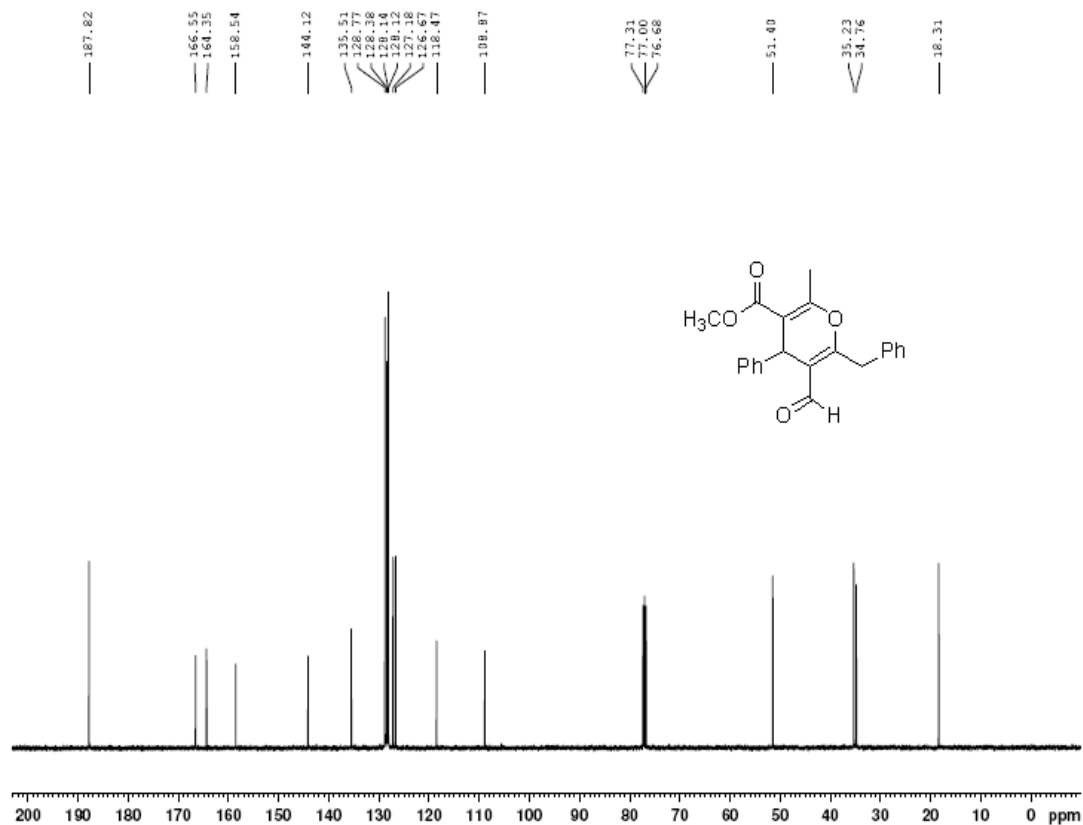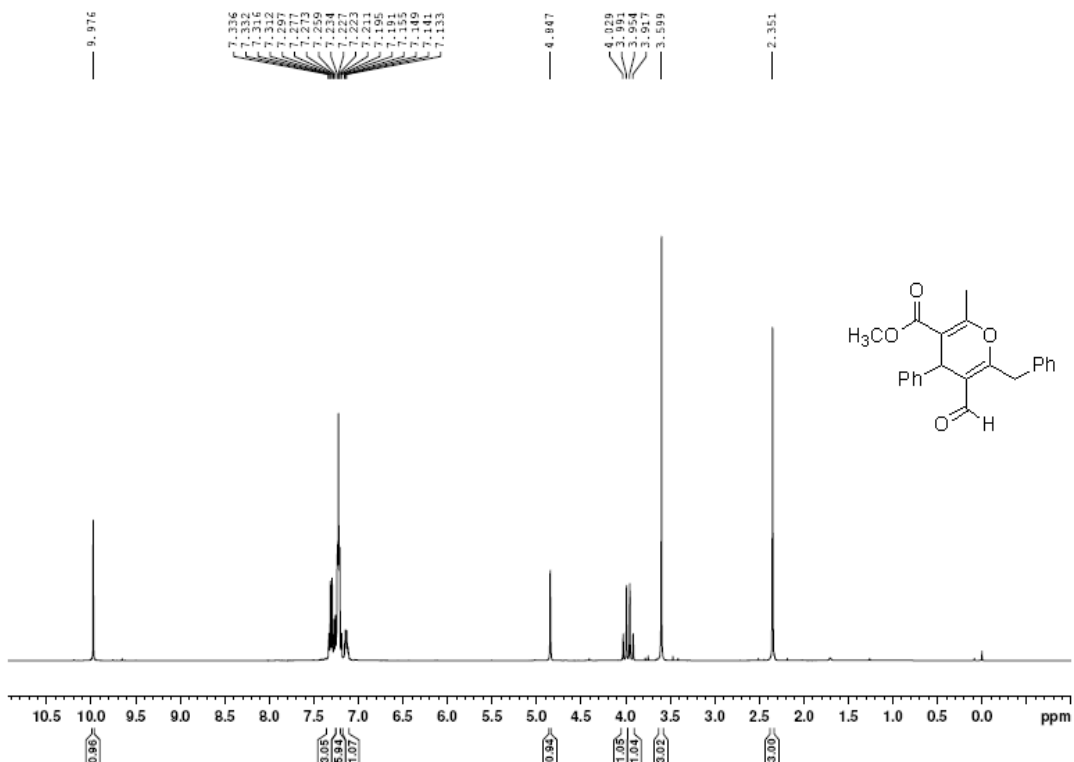

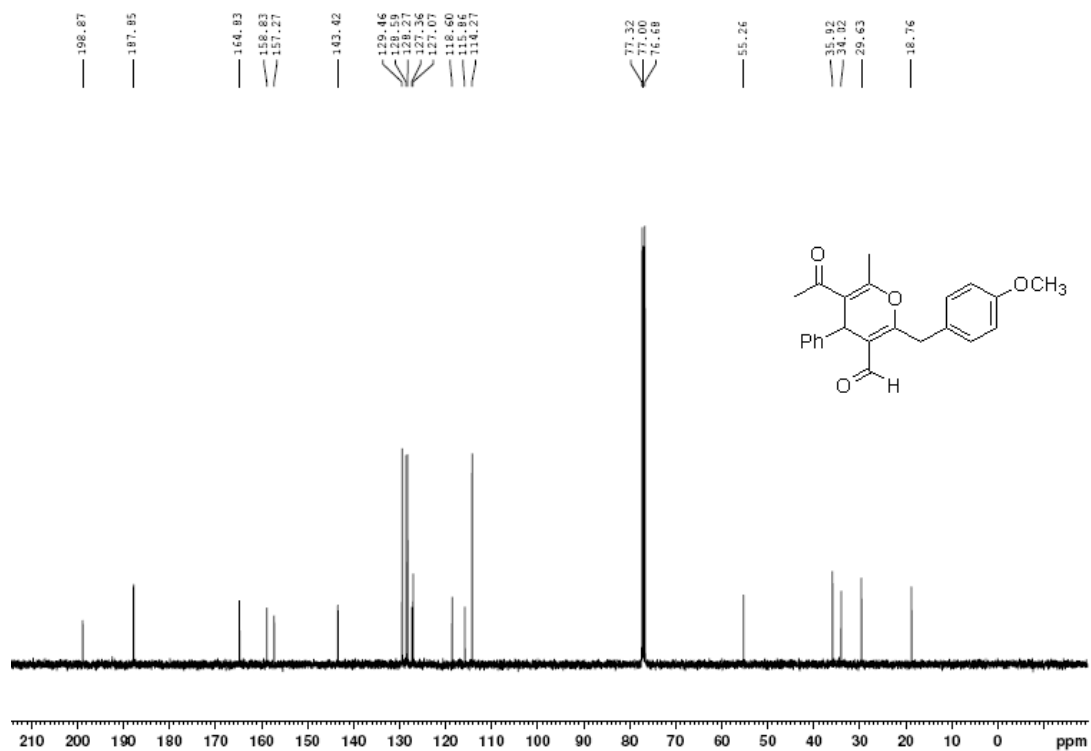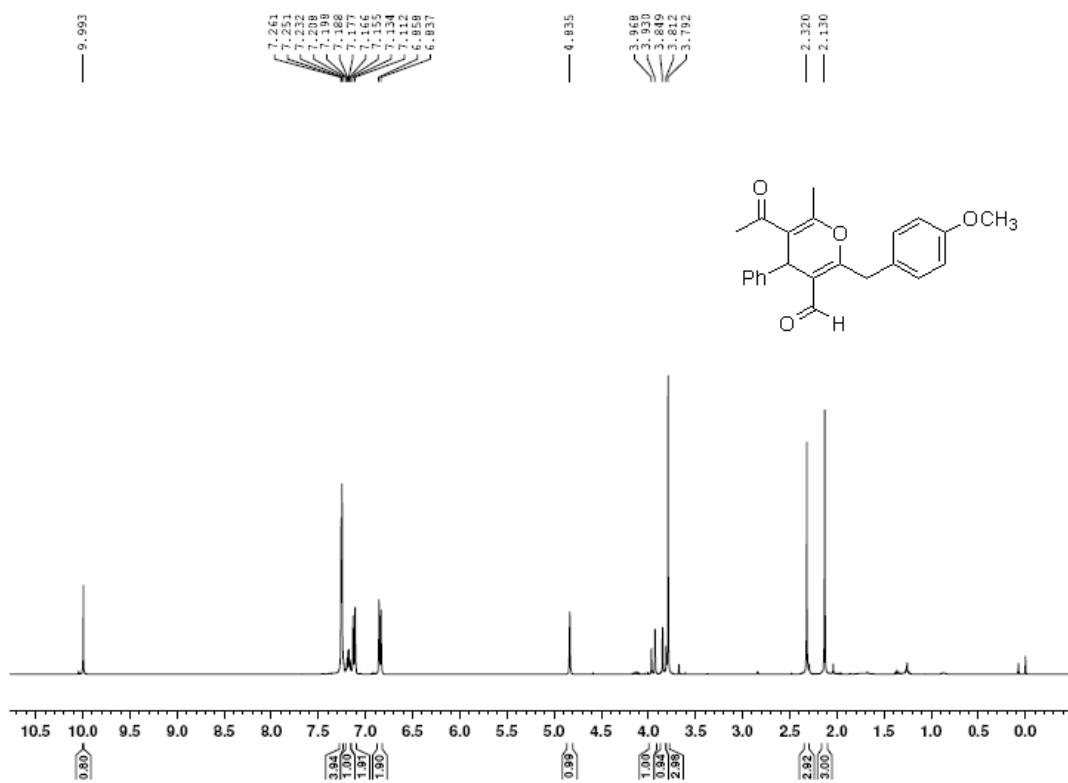



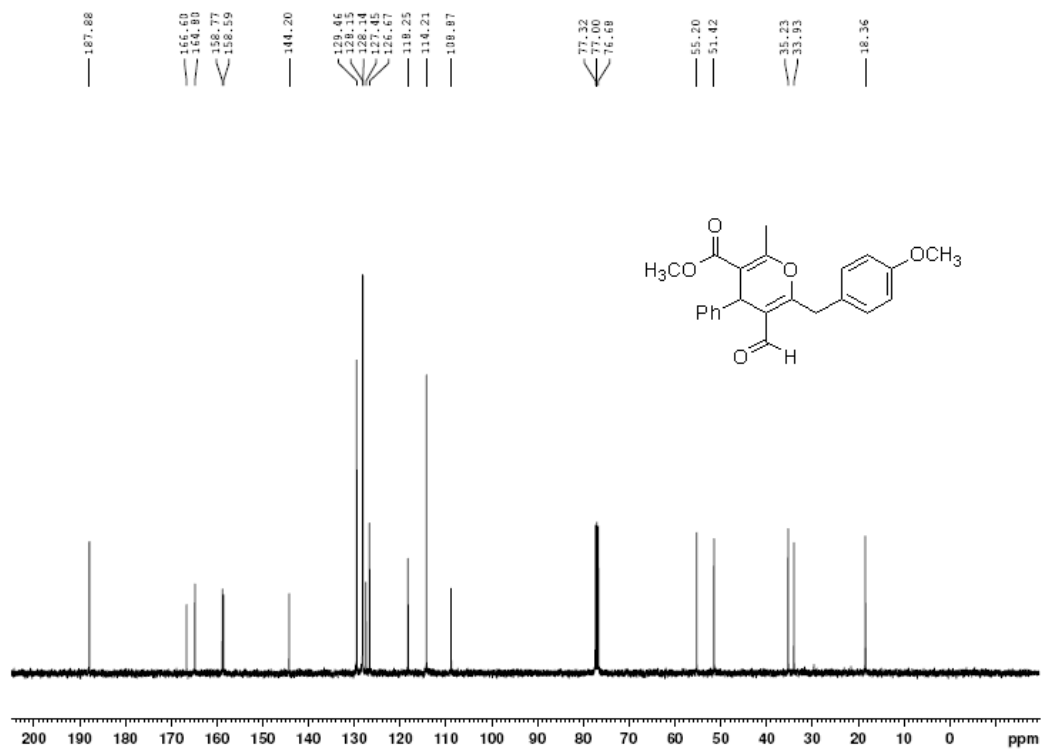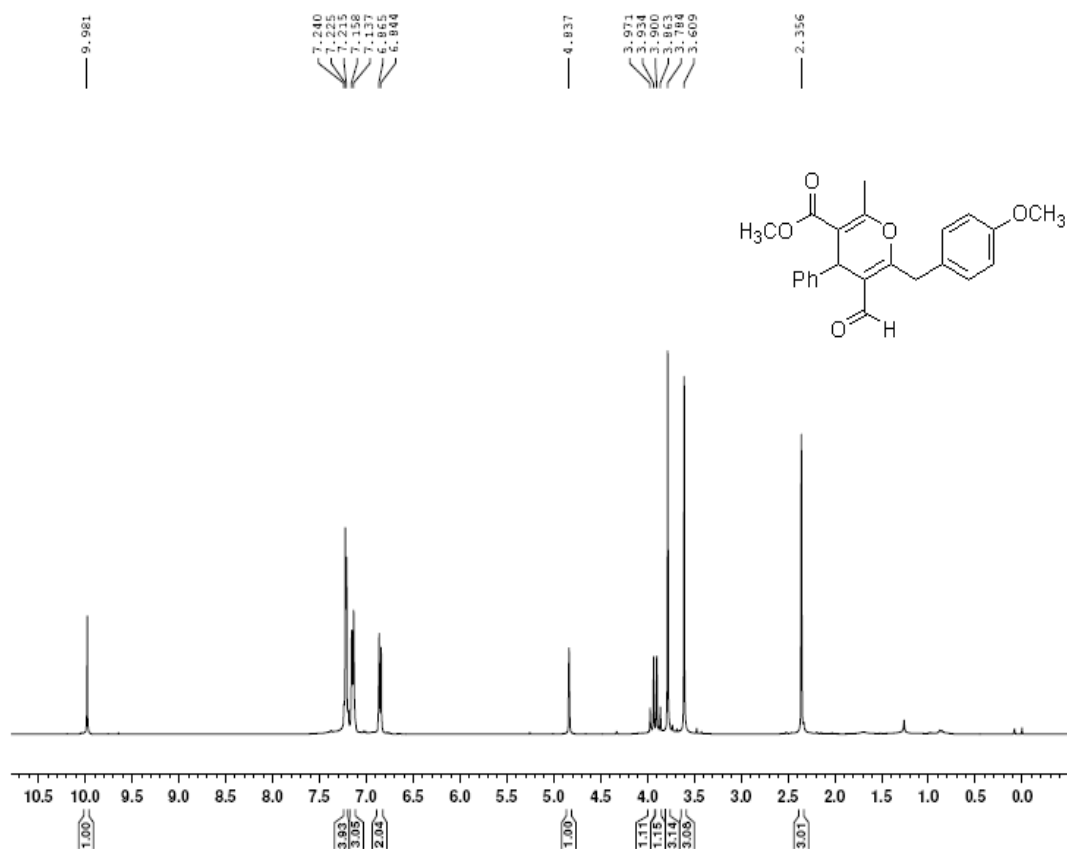

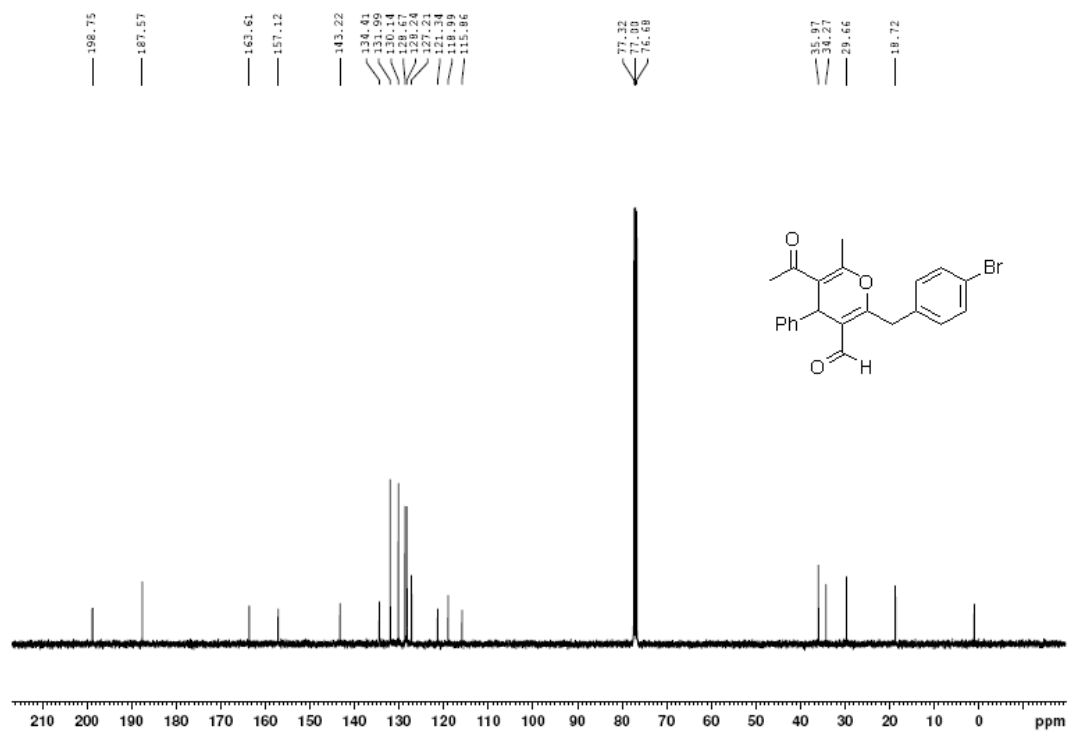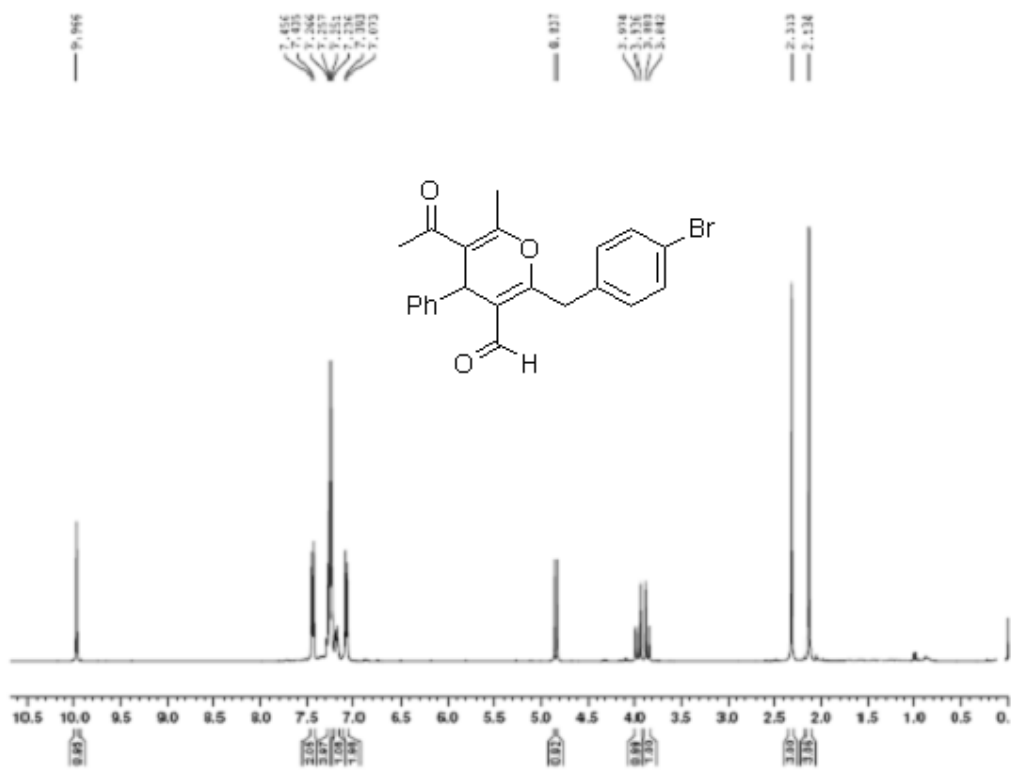

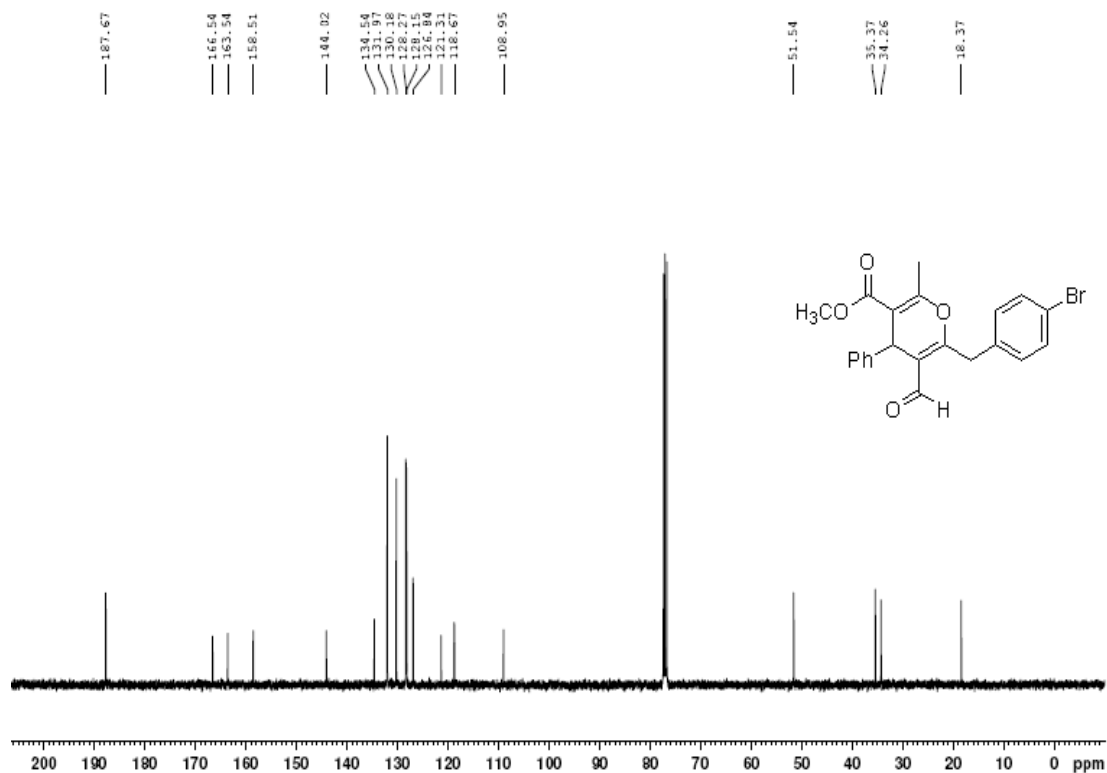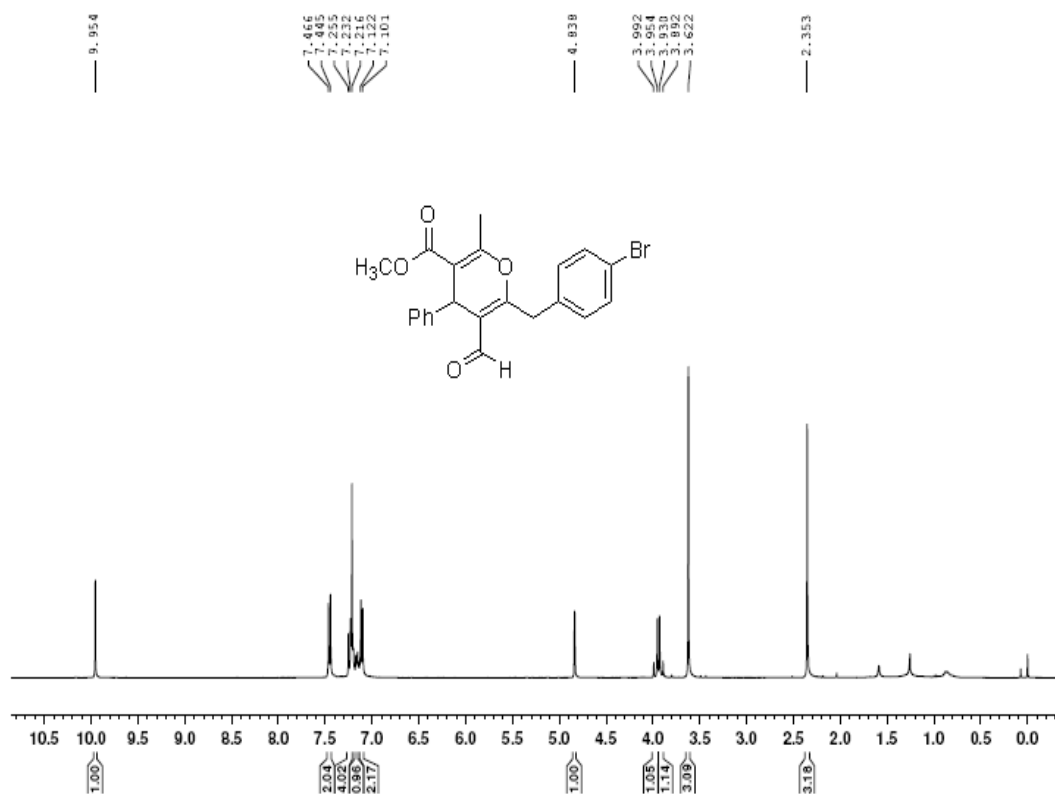

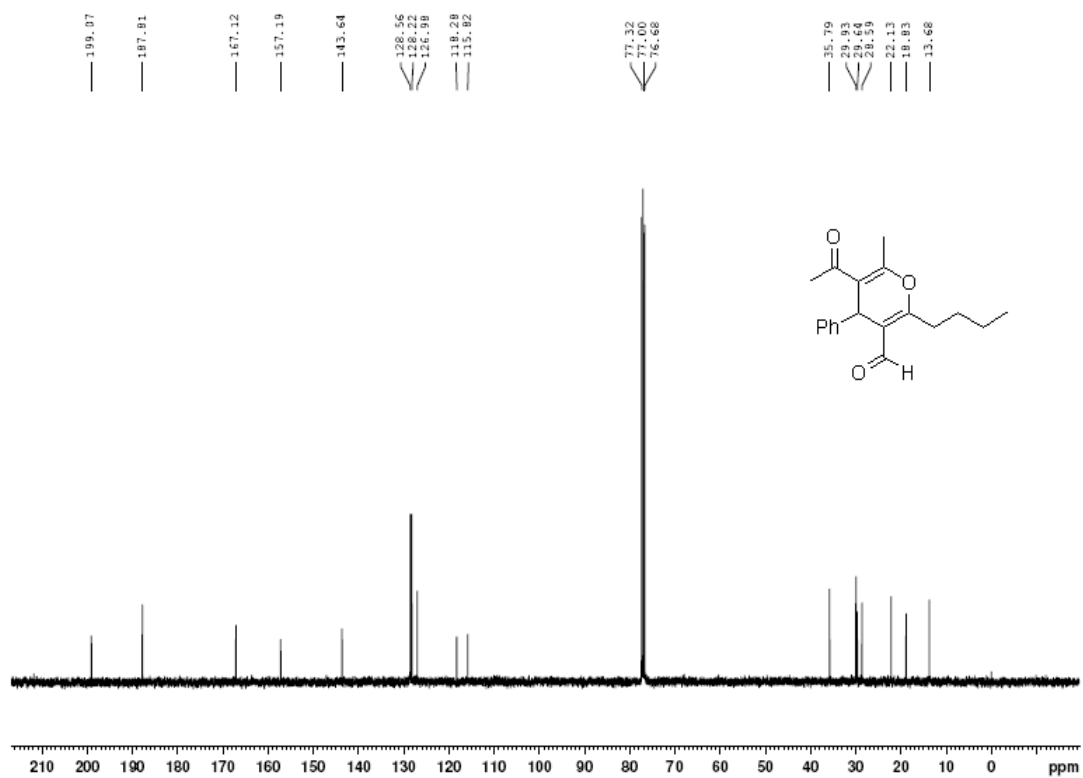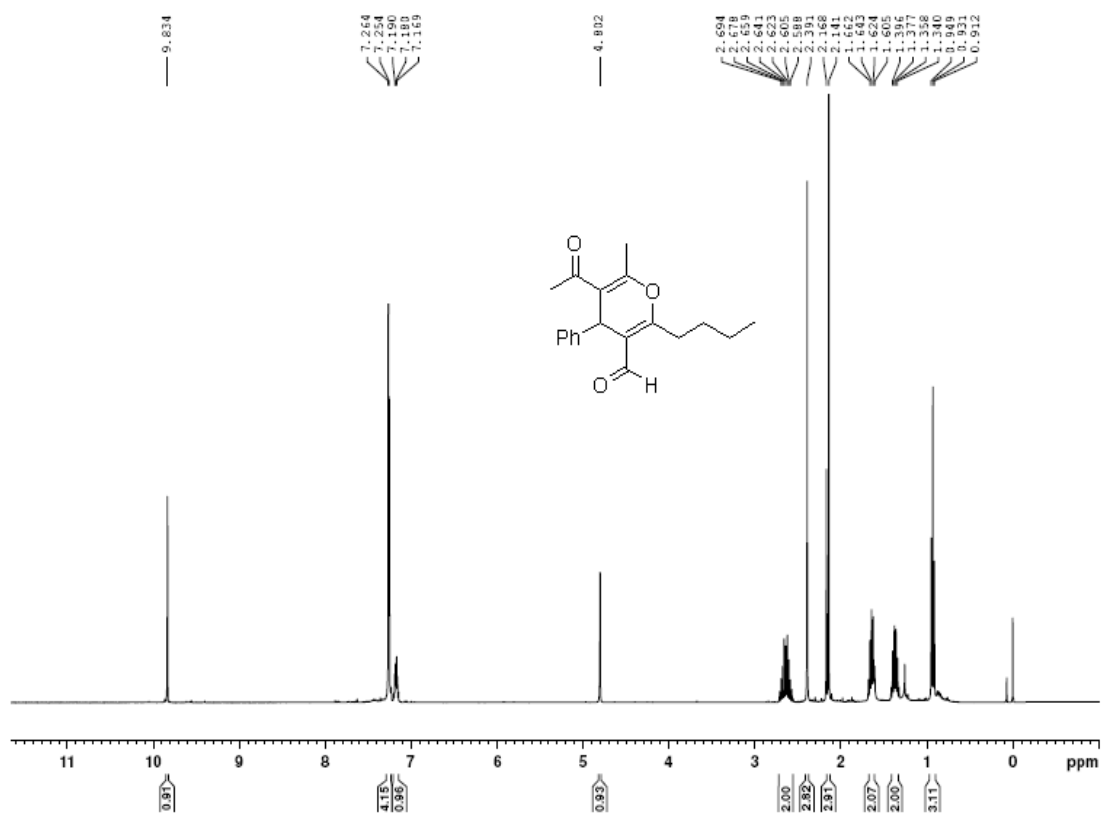

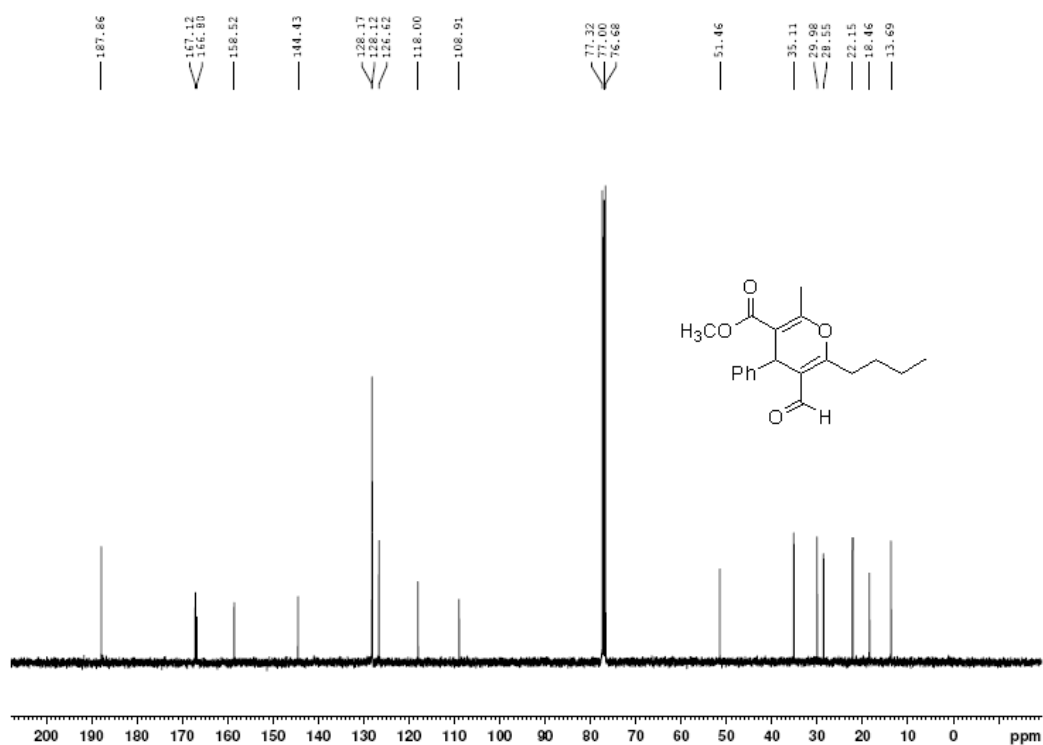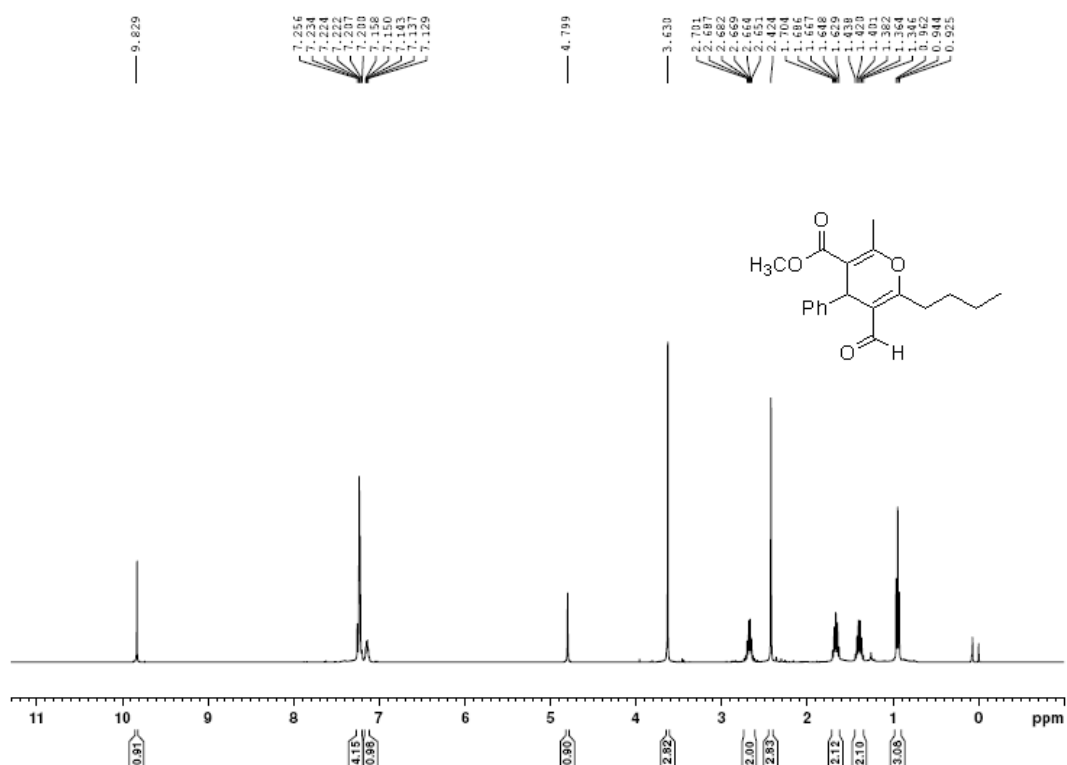

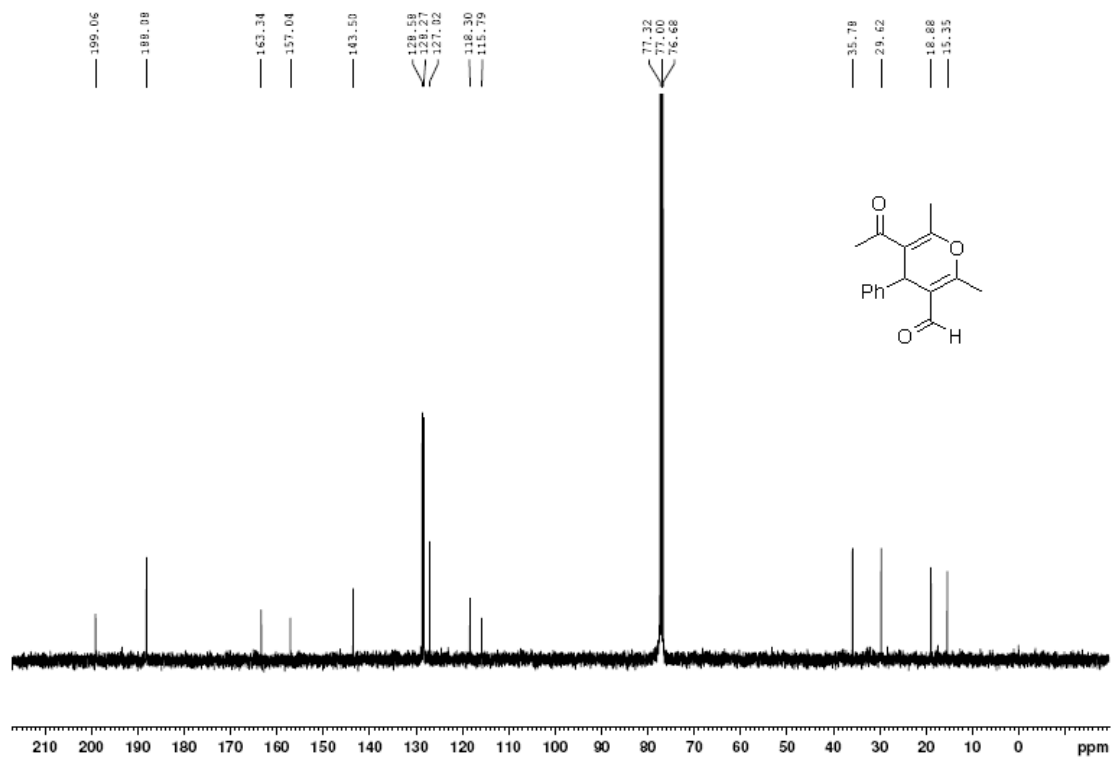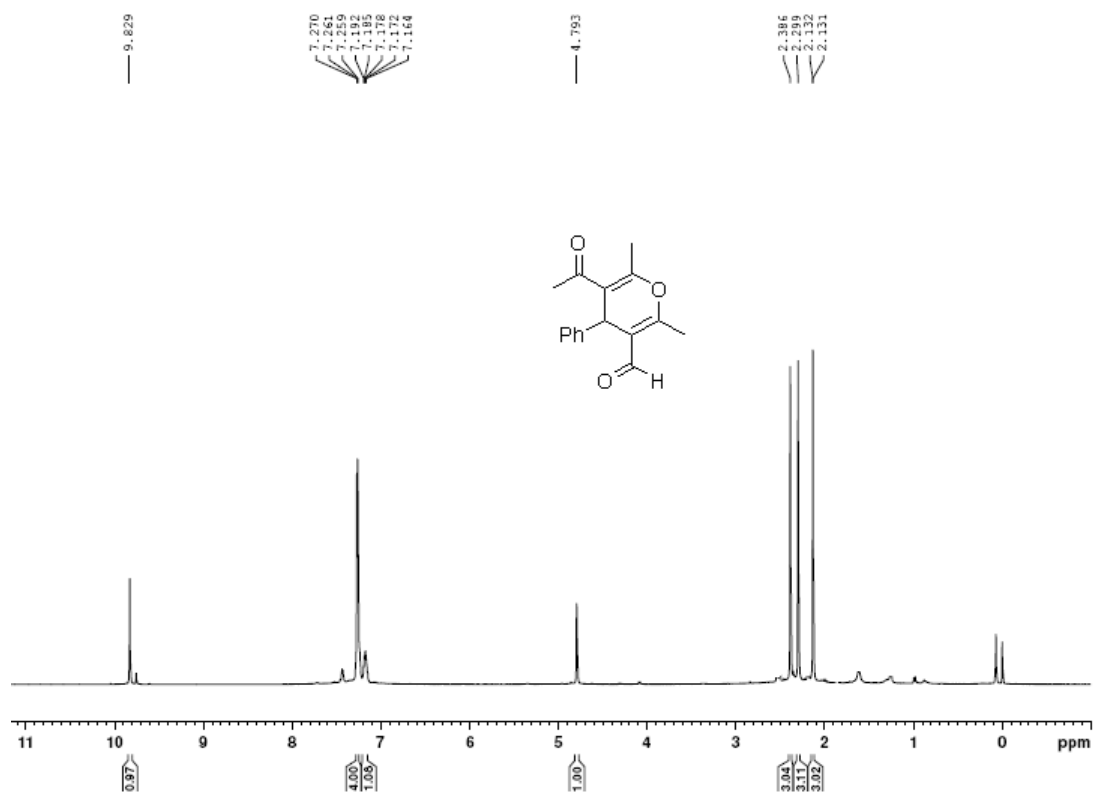

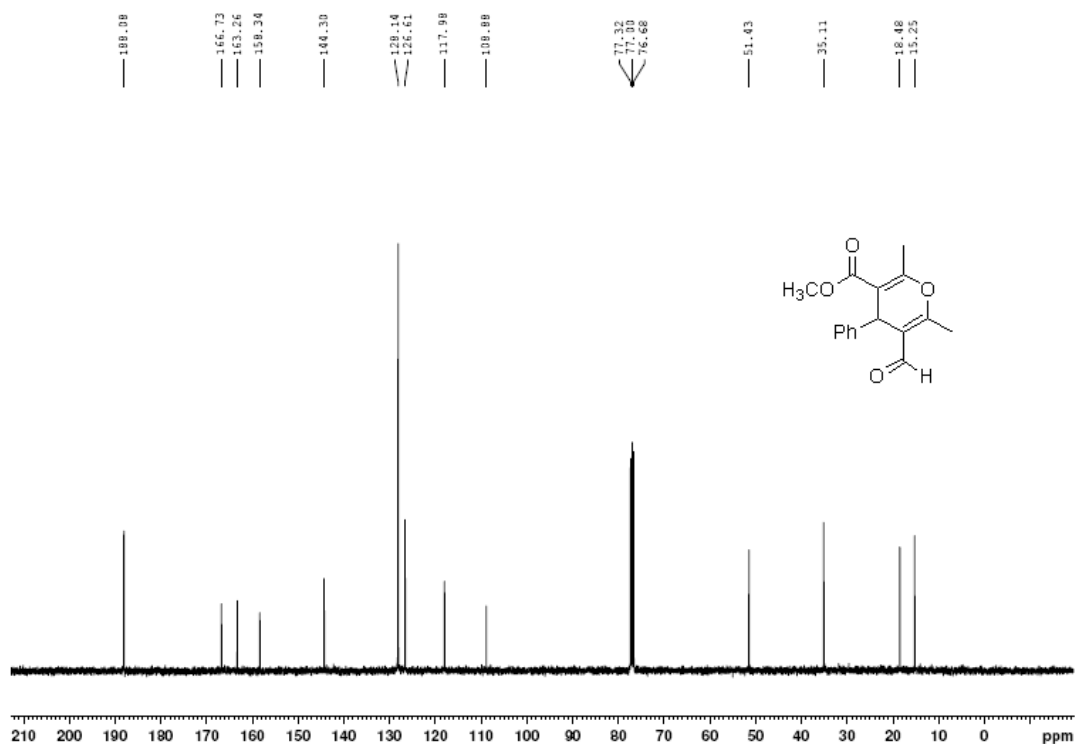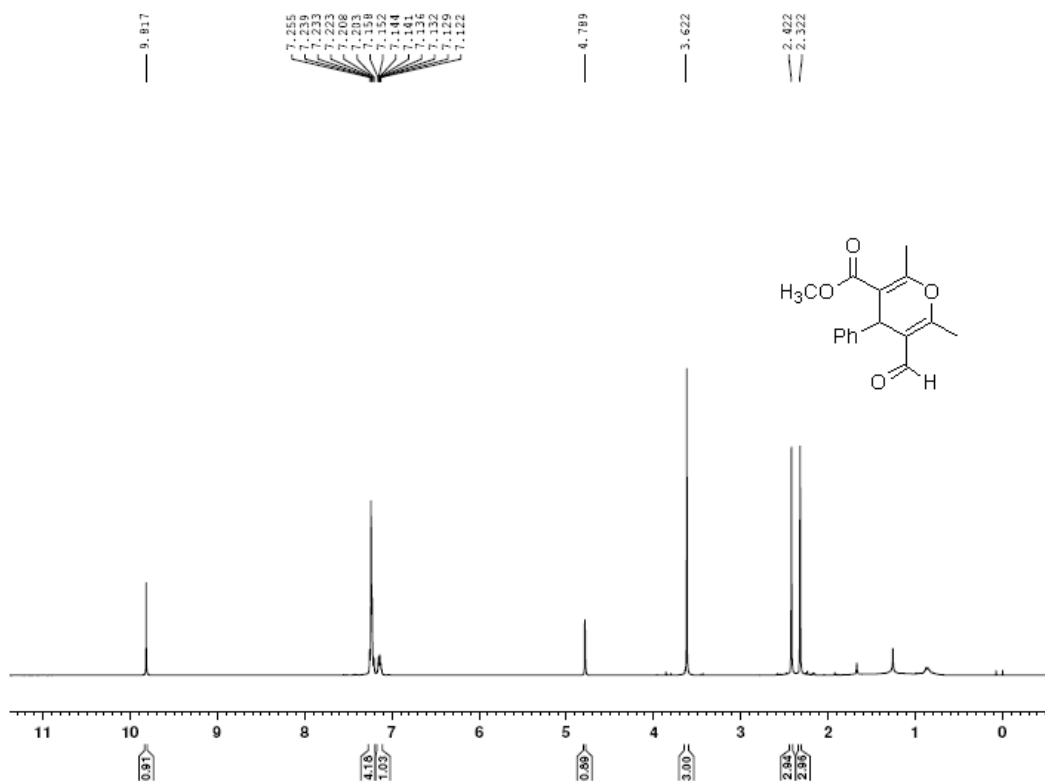

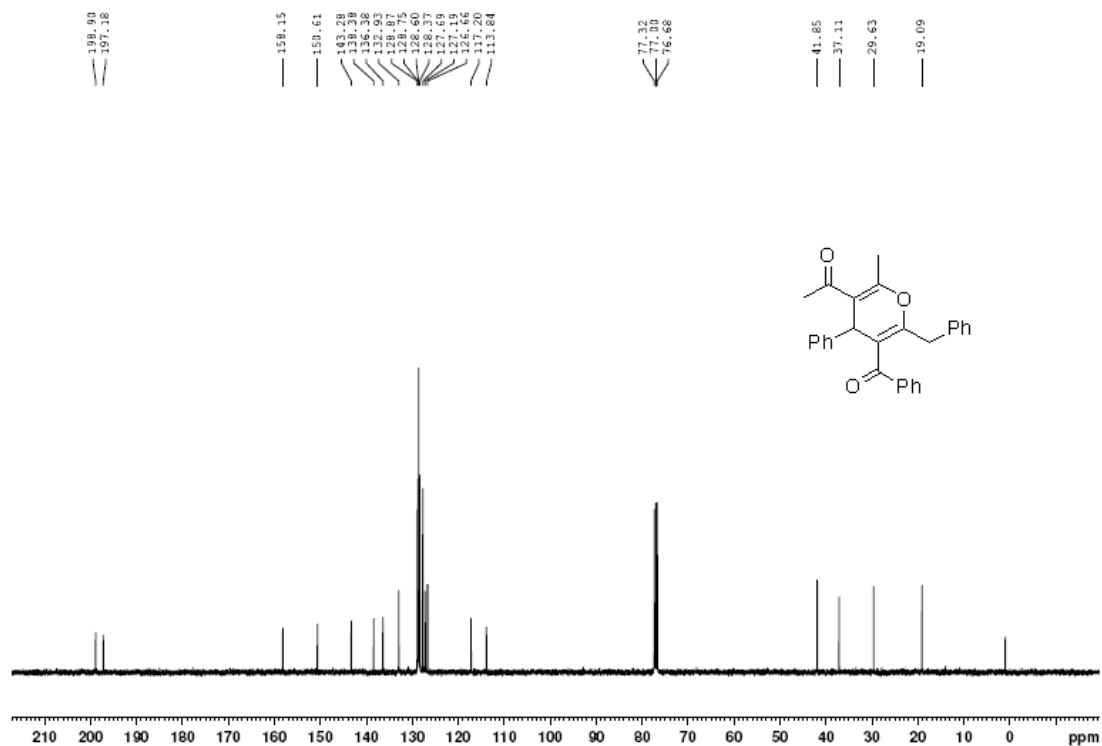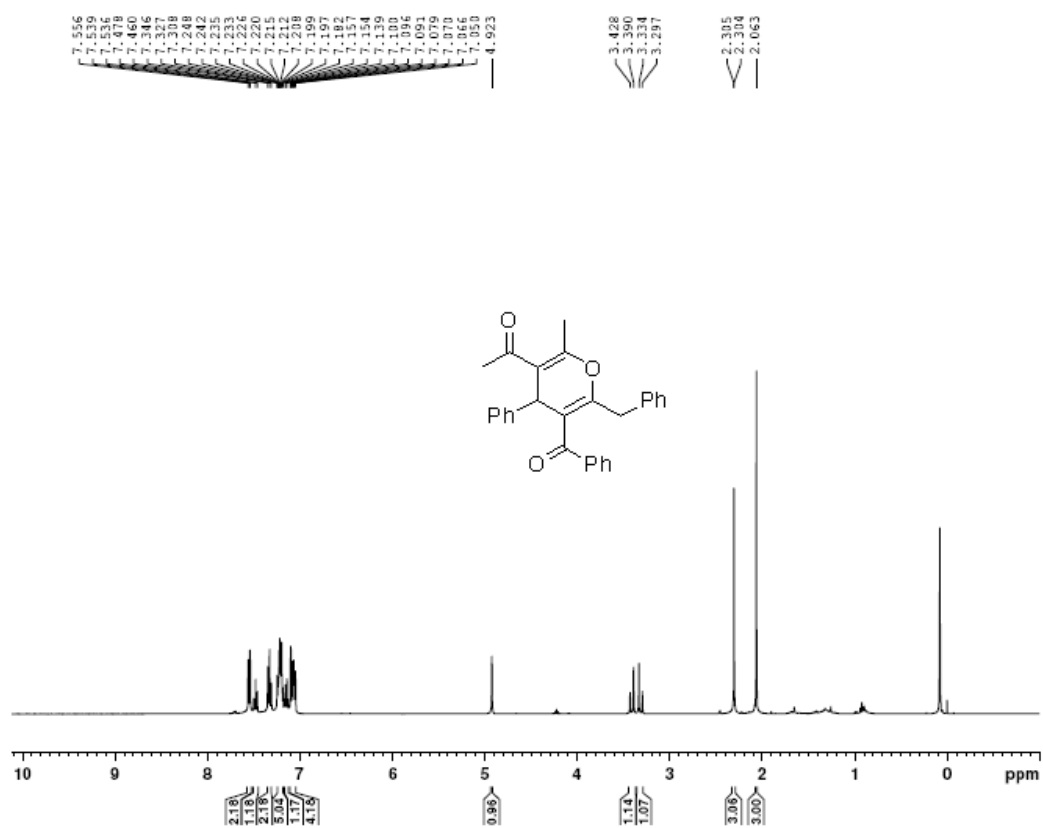



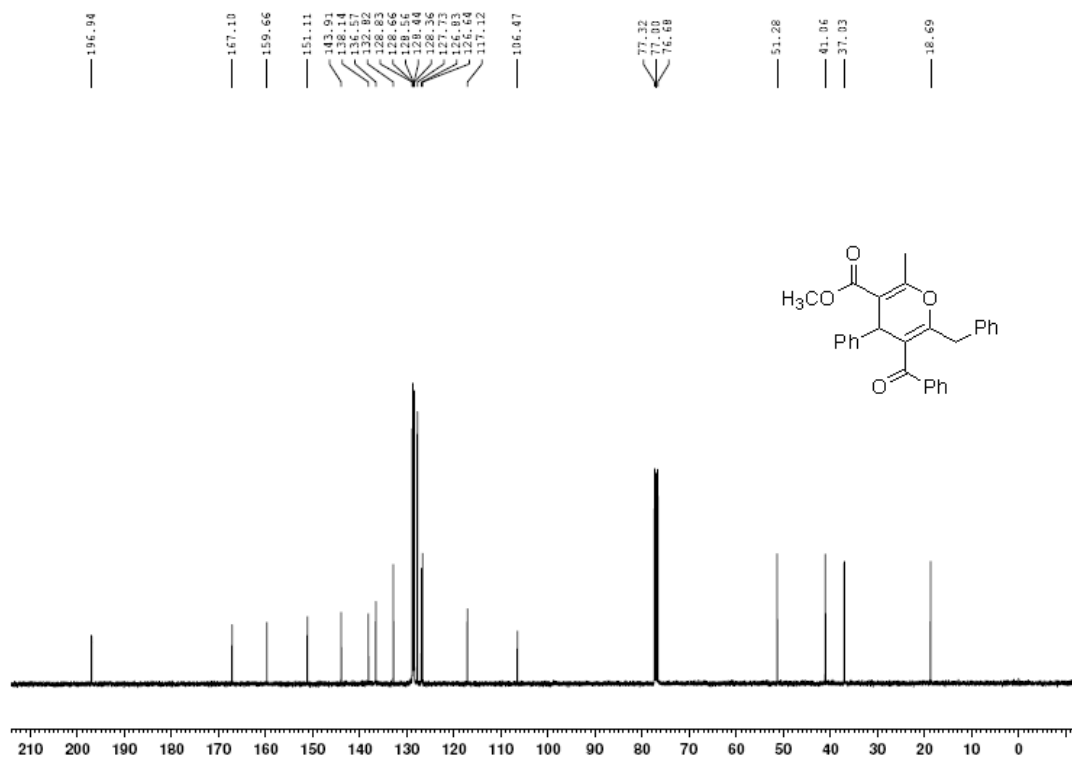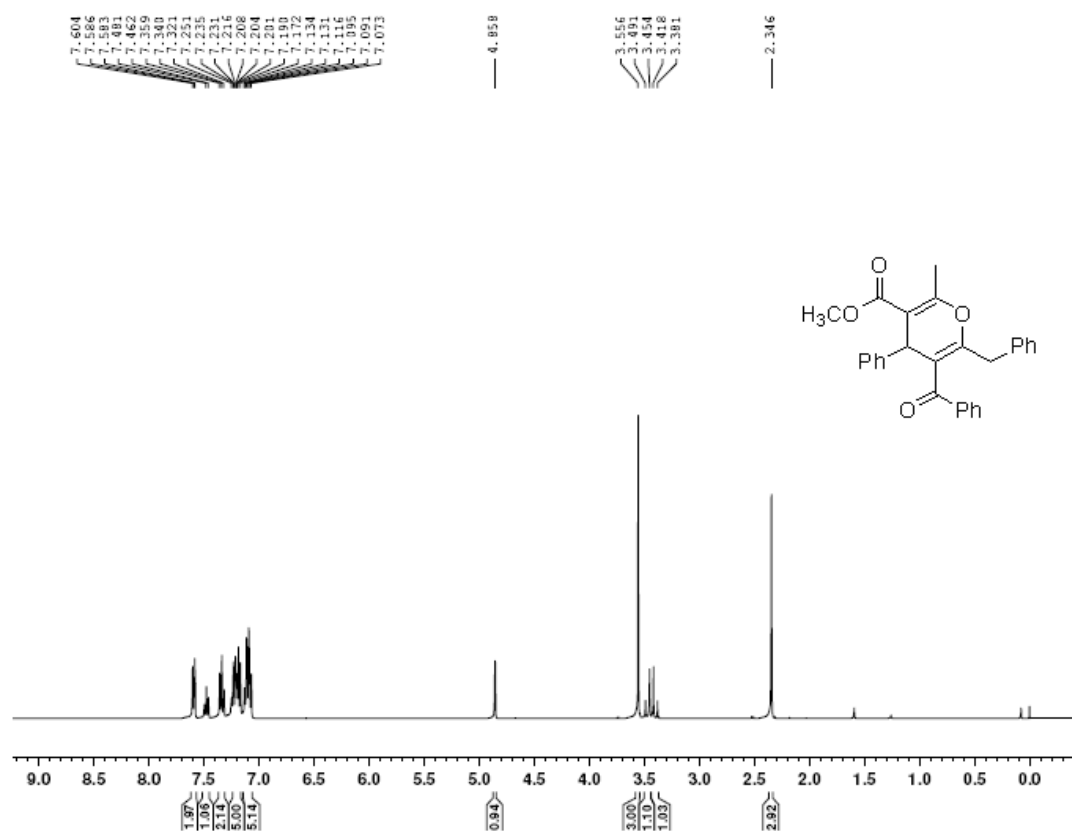

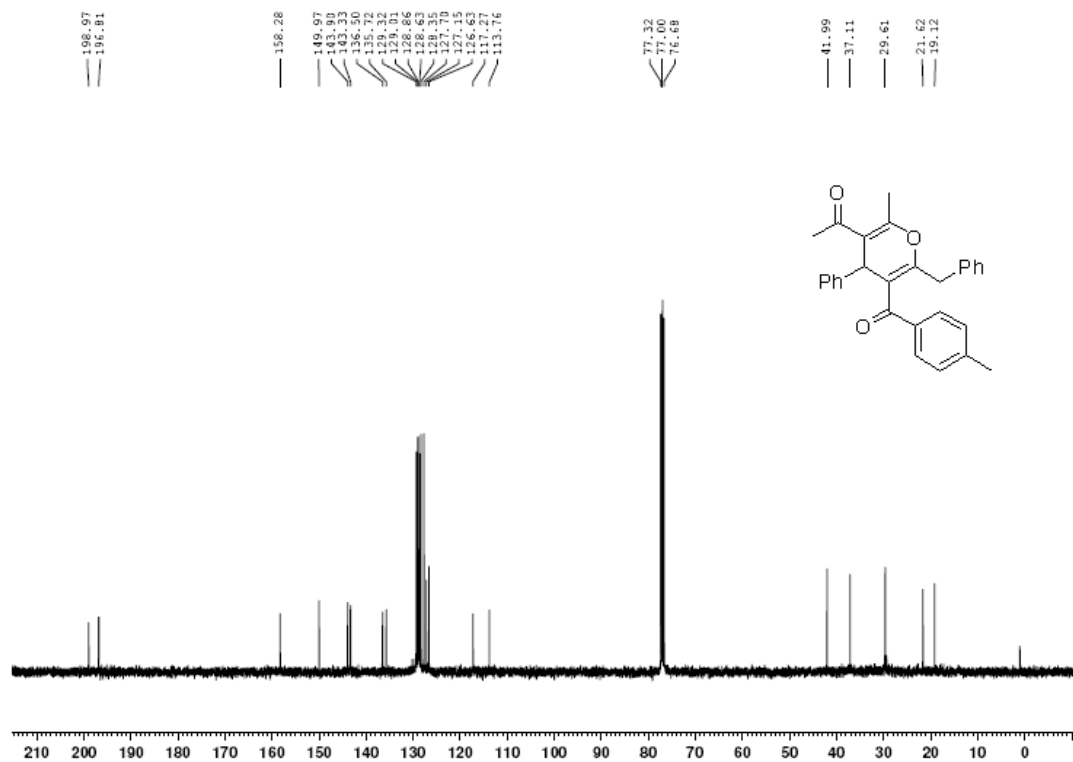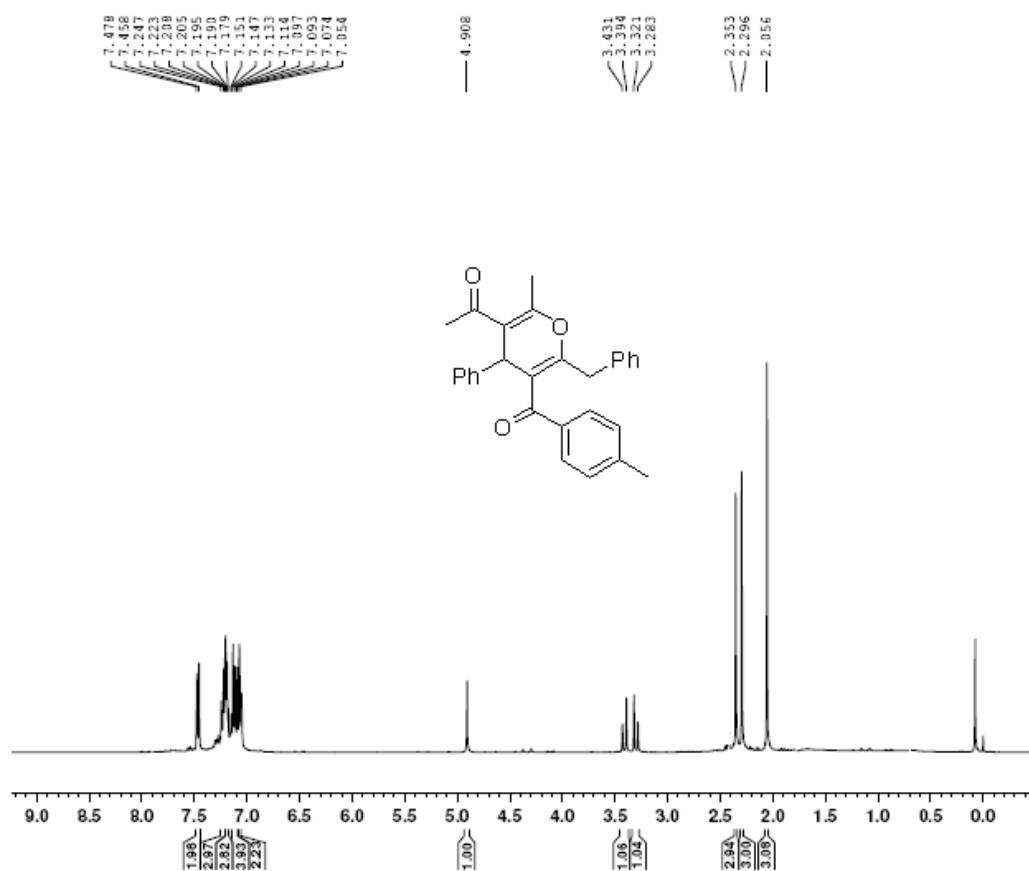

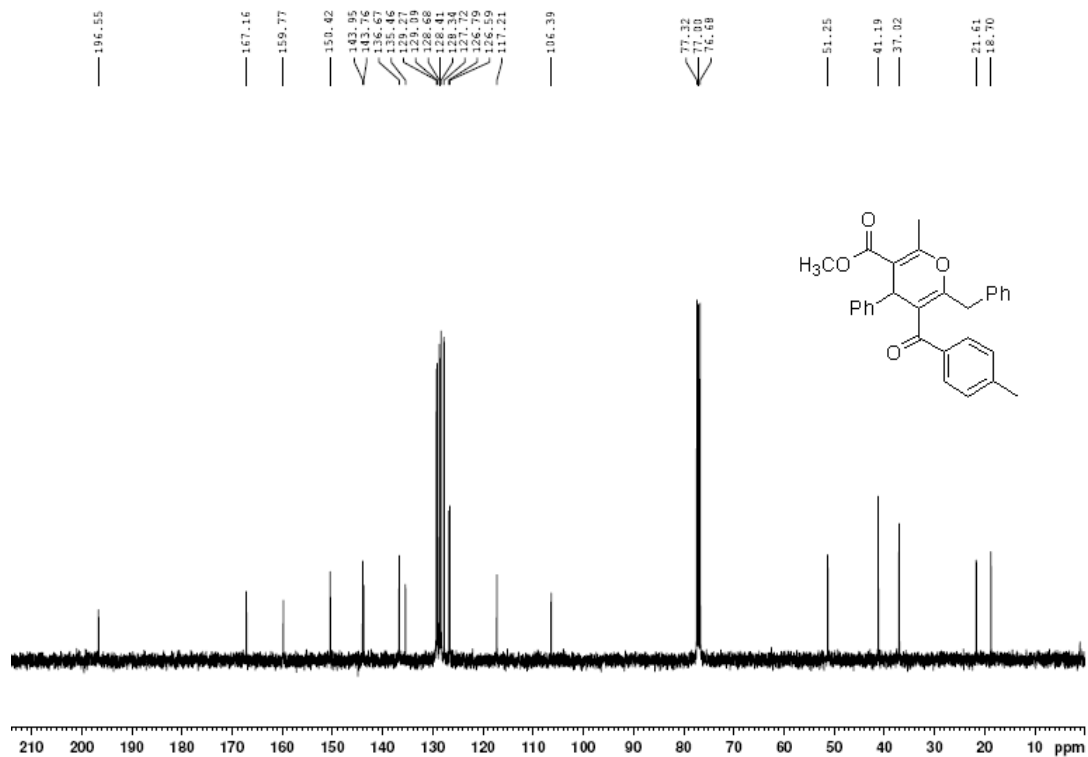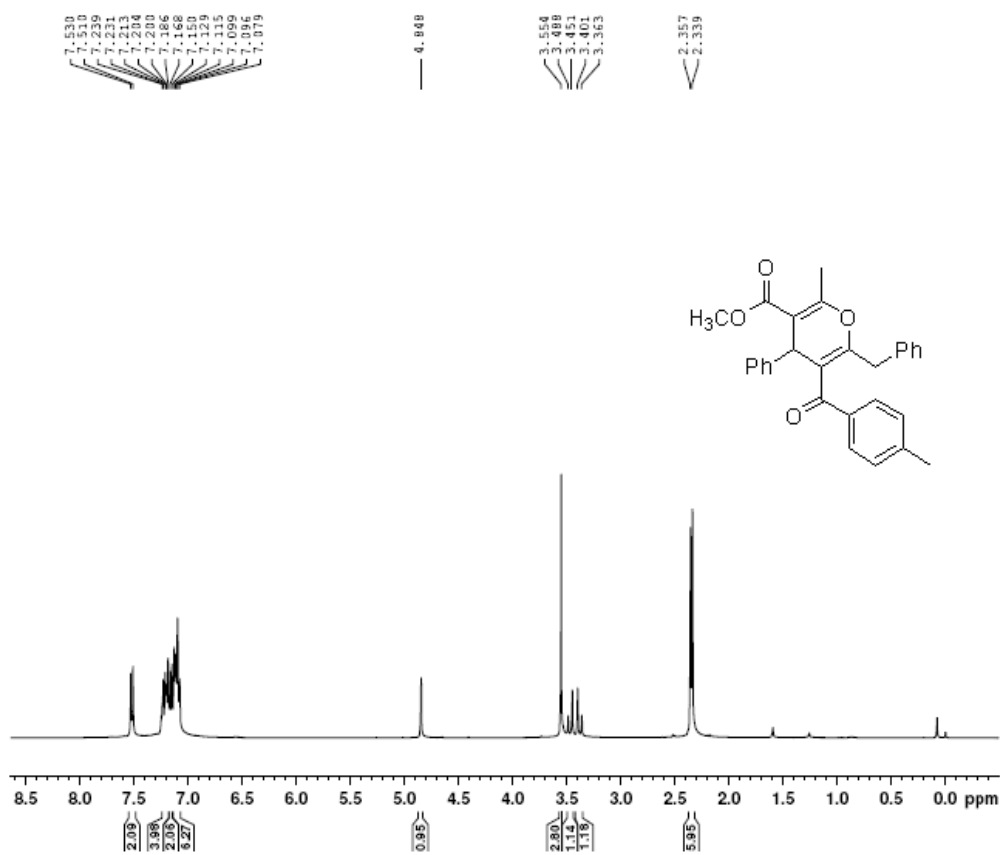

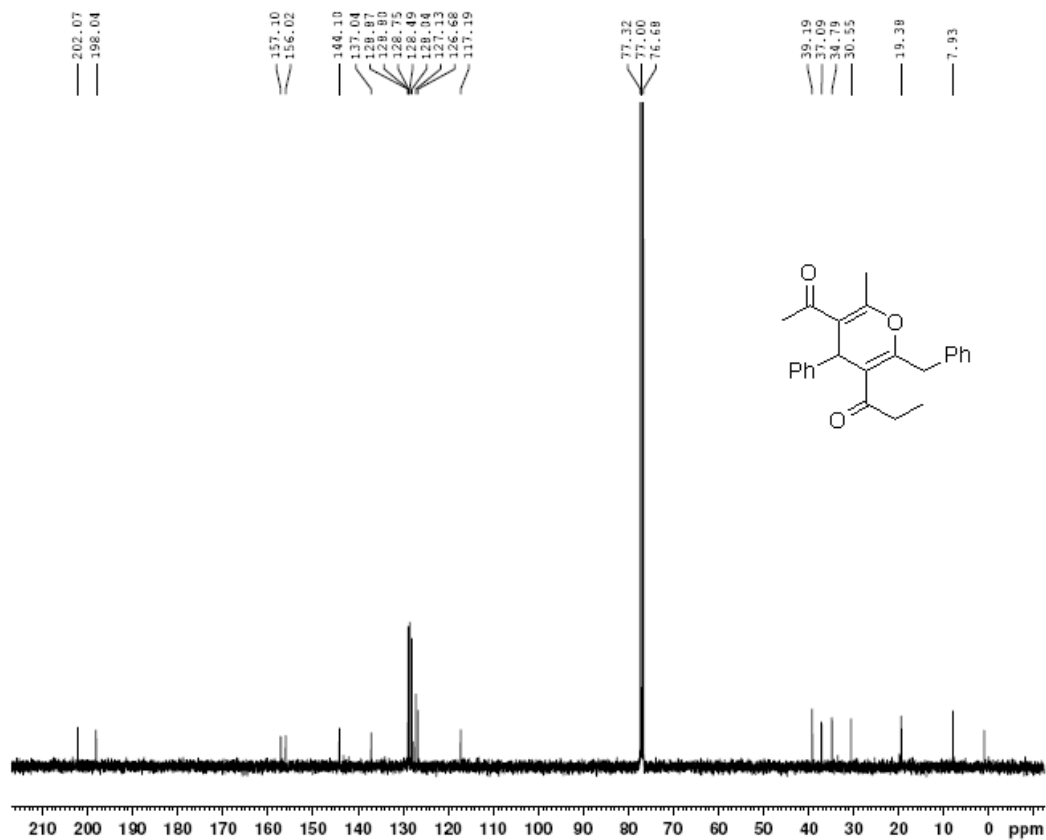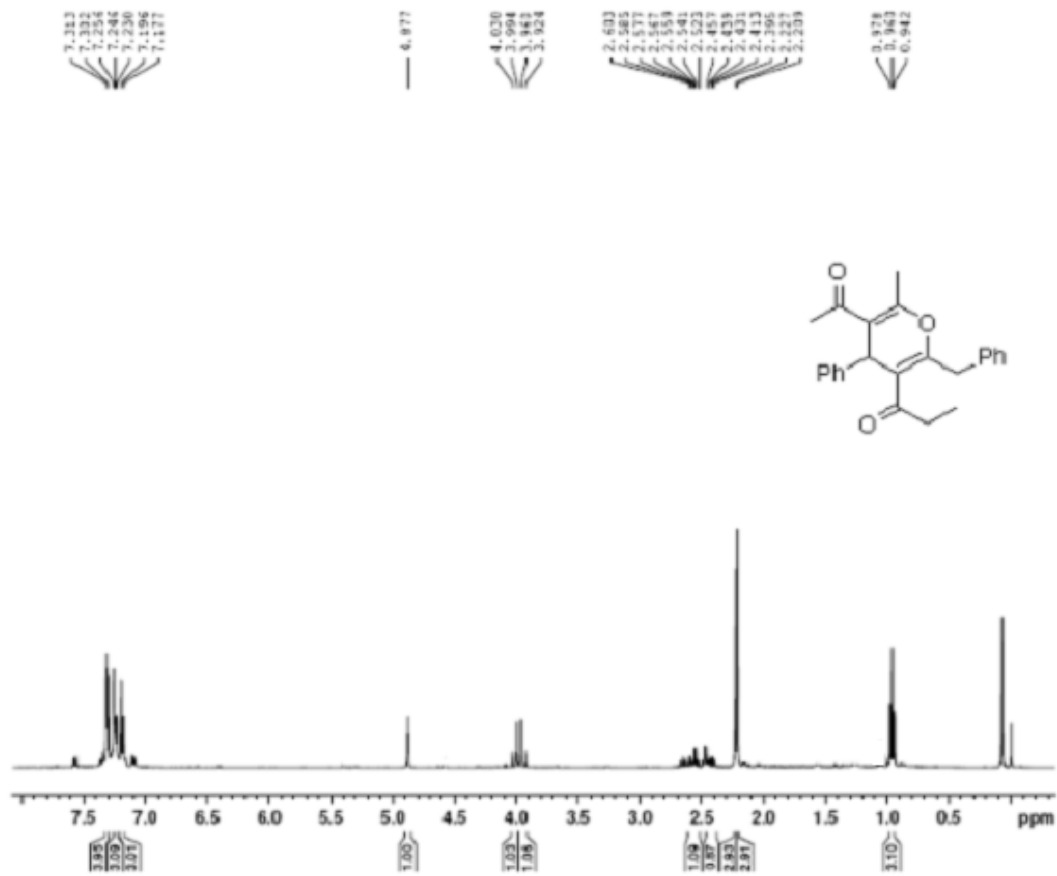

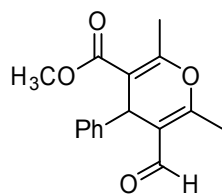

CCDC 805342

**2fb**

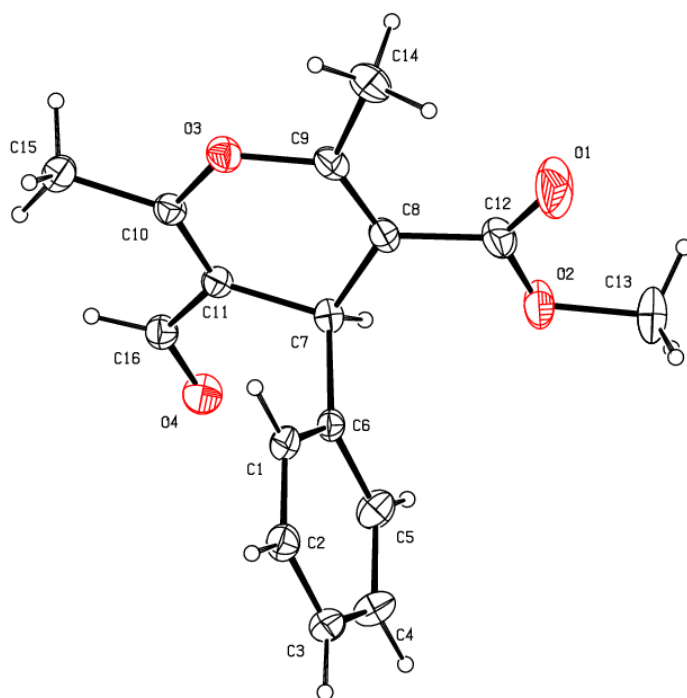

Supplement: c0ob01255f.pdf [file c0ob01255f.pdf]
